# Supplementary material for: Using community-based geographical information system (GIS) to recruit older Asian Americans in an Alzheimer’s disease study
Source: PubMed Central journal article supplement — BMJ Open. 2023 Aug 3;13(8):e072761. doi: 10.1136/bmjopen-2023-072761 (PMC10401260; doi:10.1136/bmjopen-2023-072761), 2023-08-03
Supplement: bmjopen-2023-072761.draft_revisions.pdf [file bmjopen-2023-072761.draft_revisions.pdf]

# BMJ Open

BMJ Open is committed to open peer review. As part of this commitment we make the peer review history of every article we publish publicly available.

When an article is published we post the peer reviewers' comments and the authors' responses online. We also post the versions of the paper that were used during peer review. These are the versions that the peer review comments apply to.

The versions of the paper that follow are the versions that were submitted during the peer review process. They are not the versions of record or the final published versions. They should not be cited or distributed as the published version of this manuscript.

BMJ Open is an open access journal and the full, final, typeset and author-corrected version of record of the manuscript is available on our site with no access controls, subscription charges or pay-per-view fees (<http://bmjopen.bmj.com>).

If you have any questions on BMJ Open's open peer review process please email [info.bmjopen@bmj.com](mailto:info.bmjopen@bmj.com)

# BMJ Open

## Utilizing Community Based Geographic Information System (GIS) to Recruit Older Asian Americans in an Alzheimer's Disease Study

|                                 |                                                                                                                                                                                                                                                                                                                                                                                                                                                                                                                                                                                                                                                                                                                                                                                                                                                                                                                                                |
|---------------------------------|------------------------------------------------------------------------------------------------------------------------------------------------------------------------------------------------------------------------------------------------------------------------------------------------------------------------------------------------------------------------------------------------------------------------------------------------------------------------------------------------------------------------------------------------------------------------------------------------------------------------------------------------------------------------------------------------------------------------------------------------------------------------------------------------------------------------------------------------------------------------------------------------------------------------------------------------|
| Journal:                        | <i>BMJ Open</i>                                                                                                                                                                                                                                                                                                                                                                                                                                                                                                                                                                                                                                                                                                                                                                                                                                                                                                                                |
| Manuscript ID                   | bmjopen-2023-072761.R1                                                                                                                                                                                                                                                                                                                                                                                                                                                                                                                                                                                                                                                                                                                                                                                                                                                                                                                         |
| Article Type:                   | Communication                                                                                                                                                                                                                                                                                                                                                                                                                                                                                                                                                                                                                                                                                                                                                                                                                                                                                                                                  |
| Date Submitted by the Author:   | 01-Mar-2023                                                                                                                                                                                                                                                                                                                                                                                                                                                                                                                                                                                                                                                                                                                                                                                                                                                                                                                                    |
| Complete List of Authors:       | Lee, Haeok; New York University Rory Meyers College of Nursing<br>Ha, Hoehun; Auburn University at Montgomery, Department of Biology and Environmental Science<br>Yim, Sejung ; CUNY The Graduate Center, Department of Sociology<br>Yang, Hyun-Sik ; Harvard Medical School Department of Neurology, Center for Alzheimer Research and Treatment<br>Lee, Veronica; Korean American Northeast Catholic Charismatic Renewal Association<br>Hong, Eunju; Korean American Association of Fort Lee<br>Chow, Tiffany; University of California San Diego Alzheimer's Disease Cooperative Study<br>Park, Van; University of California San Francisco, Department of Community Health Systems, School of Nursing,<br>Wang, Li-San; University of Pennsylvania Perelman School of Medicine, Department of Pathology and Laboratory Medicine<br>Jun, Gyungah; Boston University School of Medicine<br>Choi, Yun-Beom; Rutgers New Jersey Medical School |
| <b>Primary Subject Heading</b>: | Research methods                                                                                                                                                                                                                                                                                                                                                                                                                                                                                                                                                                                                                                                                                                                                                                                                                                                                                                                               |
| Secondary Subject Heading:      | Epidemiology, Geriatric medicine, Public health, Health policy, Nursing                                                                                                                                                                                                                                                                                                                                                                                                                                                                                                                                                                                                                                                                                                                                                                                                                                                                        |
| Keywords:                       | Aged, Dementia, Health Equity, Stereotyping, REGISTRIES                                                                                                                                                                                                                                                                                                                                                                                                                                                                                                                                                                                                                                                                                                                                                                                                                                                                                        |
|                                 |                                                                                                                                                                                                                                                                                                                                                                                                                                                                                                                                                                                                                                                                                                                                                                                                                                                                                                                                                |

SCHOLARONE™  
Manuscripts

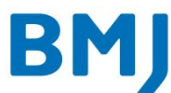

I, the Submitting Author has the right to grant and does grant on behalf of all authors of the Work (as defined in the below author licence), an exclusive licence and/or a non-exclusive licence for contributions from authors who are: i) UK Crown employees; ii) where BMJ has agreed a CC-BY licence shall apply, and/or iii) in accordance with the terms applicable for US Federal Government officers or employees acting as part of their official duties; on a worldwide, perpetual, irrevocable, royalty-free basis to BMJ Publishing Group Ltd ("BMJ") its licensees and where the relevant Journal is co-owned by BMJ to the co-owners of the Journal, to publish the Work in BMJ Open and any other BMJ products and to exploit all rights, as set out in our [licence](#).

The Submitting Author accepts and understands that any supply made under these terms is made by BMJ to the Submitting Author unless you are acting as an employee on behalf of your employer or a postgraduate student of an affiliated institution which is paying any applicable article publishing charge ("APC") for Open Access articles. Where the Submitting Author wishes to make the Work available on an Open Access basis (and intends to pay the relevant APC), the terms of reuse of such Open Access shall be governed by a Creative Commons licence – details of these licences and which [Creative Commons](#) licence will apply to this Work are set out in our licence referred to above.

Other than as permitted in any relevant BMJ Author's Self Archiving Policies, I confirm this Work has not been accepted for publication elsewhere, is not being considered for publication elsewhere and does not duplicate material already published. I confirm all authors consent to publication of this Work and authorise the granting of this licence.

Utilizing Community Based Geographic Information System (GIS) to Recruit Older Asian  
Americans in an Alzheimer's Disease Study

Haeok Lee, PhD, RN, FAAN\*

Hoehun Ha, PhD\*\*

Sejung Sage Yim, PhD\*\*\*

Hyun-Sik Yang, MD \*\*\*\*

Veronica Lee, BA\*\*\*\*\*

Eunju Hong, BA\*\*\*\*\*

Tiffany Chow, MD \*\*\*\*\*

Van Ta Park, PhD, MPH \*\*\*\*\*

Li-San Wang, PhD\*\*\*\*\*

Gyung Ah Jun, PhD \*\*\*\*\*

Yun-Beom Choi, MD, PhD\*\*\*\*\*

\*Haeok Lee, Rory Meyers College of Nursing, New York University, NY, NY, U.S.A

\*\*Hoehun Ha, Department of Biology and Environmental Science, Auburn University at  
Montgomery, Montgomery, AL, U.S.A

\*\*\*Sejung Yim, Department of Sociology, The Graduate Center, CUNY, NY, NY, U.S.A

\*\*\*\* Hyun-Sik Yang, Center for Alzheimer Research and Treatment, Department of  
Neurology, Brigham and Women's Hospital, Harvard Medical School, Boston, MA, U.S.A.

\*\*\*\*\*Veronica Lee, Korean American Northeast Catholic Charismatic Renewal Association,  
Fort Lee, NJ, U.S.A.

\*\*\*\*\* Eunju Hong, Former President of Korean American Association of Fort Lee, Fort Lee,  
NJ, U.S.A

## Dementia Recruitment Minority

2

\*\*\*\*\* Tiffany Chow, University of California San Diego Alzheimer's Disease  
Cooperative Study, La Jolla, CA, U.S.A

\*\*\*\*\* Van Ta Park, Department of Community Health Systems, School of Nursing,  
University of California San Francisco, San Francisco, CA, U.S.A.

\*\*\*\*\* Li-San Wang, Pathology and Laboratory Medicine, School of Medicine,  
University of Pennsylvania, Philadelphia, PA, U.S.A.

\*\*\*\*\* Gyungah Jun, College of Medicine, Boston University, Boston, MA, U.S.A

\*\*\*\*\* Yun-Beom, Choi, Neurology, Rutgers New Jersey Medical School,  
Newark, NJ, U.S.A.

**Corresponding author:**

Haeok Lee, Professor, Meyers College of Nursing, New York University, 433 First Ave NY,  
USA 10010; [hl5209@nyu.edu](mailto:hl5209@nyu.edu); Tel: 212-998-5714; Fax: None

1 Dementia Recruitment Minority 3  
2  
3

4 **Keywords:** Dementia; Aged; Health Equity; Stereotyping; Registries  
5  
6  
7  
8  
9  
10  
11  
12  
13  
14  
15  
16  
17  
18  
19  
20  
21  
22  
23  
24  
25  
26  
27  
28  
29  
30  
31  
32  
33  
34  
35  
36  
37  
38  
39  
40  
41  
42  
43  
44  
45  
46  
47  
48  
49  
50  
51  
52  
53  
54  
55  
56  
57  
58  
59  
60

For peer review only

## Dementia Recruitment Minority

4

**Abstract**

**Objective:** This paper addresses both physical and sociocultural factors in recruitment and engagement of Asian American older adults in clinical studies and describes a novel recruitment strategy using community-based Geographic Information System (GIS). This GIS map visualizes sociocultural and geographic trends in the local population which may enhance our understanding of the heterogeneity of minority population distribution and inform community outreach efforts.

**Methods:** The recruitment strategies of Korean American (KA) subgroups as a part of ACAD cohort study, have been developed to evaluate a novel community-based GIS sampling method for delineating boundaries for geographic clusters and social networks of KA populations that are disproportionately understudied and under-served. A chain referral sampling method, like other form of respondent-driven sampling was utilized.

**Results:** GIS maps show a visualization of the heterogeneity of sociodemographic characteristics and the resources of faith-based organizations and KA serving local clinics. We addressed these factors that disproportionately affect accessing and participating in clinical research and successfully recruited the aimed participants (n=60) in the proposed period.

**Discussion:** This innovative strategy, using a target group tailored GIS map, will provide the necessary groundwork for a subsequent large-scale, fully powered clinical genetic epidemiology study to test the usefulness and effectiveness of our novel decolonizing community-centered recruitment method.

**Policy Implication:** This approach responds to the call from NIA to develop strategies to improve the health status of older adults in diverse populations. Results from the full-scale clinical study will provide health researchers and policy makers with practical evidence on how

## Dementia Recruitment Minority

5

to identify and increase participation of Asian American older adults in clinical studies that could be used as a national model for reducing health and research disparities among minority older adult populations.

For peer review only



**Strengths and limitations**

- This study responds to the call from NIA to build diverse community partnerships to improve recruitment of minorities (Milestone 12.a). We did so to engage community and academic partners by developing community-based GIS to identify and recruit hard-to-reach populations.
- This study created a novel community-based GIS maps which provides a comprehensive overview with visual representation of the heterogeneities of social factors and physical clusters for the targeted population.
- Our successful recruitment of KA older adults is due to multiple recruitment strategies including target population tailored GIS, detailed understanding of the target population as well as existing community capacity and respected relationships between the community and researchers
- Using publicly available social network data has inherent limitations related to completeness, correctness and timeliness reporting and there are limitations to using social networks observed in social datasets which may be different from the underlying (offline) networks.
- Though recruitment to clinical studies with Asian American older adults is complex, only Korean speaking Korean American older adults are included.

## Introduction

Alzheimer's Disease and related dementia (ADRD) affects 5.8 million people in the U.S. and 50 million worldwide.<sup>1,2</sup> The annual global cost of dementia is now above \$1.3 trillion and is expected to rise to \$2.8 trillion by 2030.<sup>3,4</sup> The literature on ADRD shows constant and adverse health disparities as well as research disparities across racial and ethnic groups.<sup>5,6</sup> Though many AD variants are population-specific or have different frequencies across populations, like most complex diseases, the AD literature has a strong bias toward European ancestry<sup>6,7</sup>, and there are substantial disparities in minority participation in AD studies. Despite the call from the National Institute of Health (NIH) for the inclusion of more representative groups in clinical studies, racial/ethnic minorities, older adults, those with lower socioeconomic status, and immigrant subpopulations remain underserved, understudied, and underrepresented.<sup>6,8-10</sup>

Older racial/ethnic minority populations are growing faster than their non-Hispanic White counterparts and will comprise 45% of the older adult population by 2060.<sup>11</sup> The number of Asian Americans who are 65 years and older will increase by 352% by 2060 and comprise 21% of the total Asian American population by 2060.<sup>11,12</sup> Participation of Asian Americans in the ADRD interventional trials is very low (i.e., <1%)<sup>6,13,14</sup> and investigations of ADRD in Asian American populations are woefully inadequate, so the generalizability of scientific findings for Asian Americans is questionable. The availability of reliable data is imperative to the attainment of the regional profiles of health equity in the U.S.<sup>15</sup> However, in Healthy People 2020, as in most other national health reports, ADRD data about Asian Americans is absent. The main reasons for the omission of Asian Americans in health care studies are the barriers present in Asian American communities that include mistrust of outsiders, lack of knowledge, language barriers, lack of health insurance, and sociocultural barriers.<sup>9-12,16-19</sup> It is difficult to gain access

## Dementia Recruitment Minority

8

to Asian Americans because they are dispersed throughout the country and tend to have a low level of contact with the healthcare system. However, there are states where Asian Americans are concentrated such as California, New York, and Texas, and ethnic enclaves in various metropolitan areas such as Chinatown, Koreatown, and Little Saigon as well as based on social factors including churches.<sup>16-19</sup>

There is a need to develop sampling methods that are responsive to ethnicity and sociocultural diversity among study populations and to be able to generalize scientific findings for Asian Americans.<sup>9,10,18</sup> As for older Asian American populations, they show specific characteristics that make them different from other ethnic groups and their younger counterparts, including language, health beliefs, health attitudes, lower economic status, and social networks.<sup>17,19-22</sup> These characteristics may act as either facilitators or barriers to participation in clinical studies, including ADRD.

The strategies to identify geographical and socio-environmental trends among Asian Americans, particularly in the older population, may enhance recruitment of the study participants. One strategy that may be efficient and productive in this endeavor is the use of Geographical Information Systems (GIS). GIS could enhance the visual perception of physical and social environments by mapping layers of data information and its relationship to the location of the study population. The use of GIS techniques in public health studies has developed significantly in recent years.<sup>23-27</sup> Many public health researchers have found that visualization of the spatial distribution of health-related events of target populations and making informed public health decisions faster are the two primary applications of GIS data/methods in health-related studies.<sup>25, 28, 29</sup>

The purpose of this paper is to report on outreach and recruitment strategies employed by community-based participatory research participatory combined with GIS to address both space special and social factors in the recruitment and engagement of Korean American older adults which is a part of the ACAD pilot study. The ACAD is the first large AD cohort for Asian ancestry in America and Canada focusing on the recruitment of Chinese, Korean, and Vietnamese. Our main objective is to show the effectiveness of using community-based GIS to recruit a hard-to-reach Korean elderly population by 1) creating a few GIS maps to capture the physical and sociocultural characteristics of the sample population and 2) referencing the maps to effectively recruit the sample population. In doing so, we focus on identifying KAs with and without dementia in NJ.

### **Method**

A pilot ACAD study has been conducted with KA subgroup aged 60 years and older in NJ. The goal was to recruit 60 KA individuals with and without dementia. This study is approved by the institutional review board of a university in the Northeast United States. This research paper only covers the recruitment strategy of the KA study site in NJ. We used a holistic community approach model by applying GIS to delineate boundaries for geographic clusters and church- and senior- networks, and KA serving ethnic clinics within identified clusters to recruit participants from the community.<sup>30</sup>

### **Geographic context of Korean Americans**

Although there are concentrations of KAs in CA and on the East Coast, KAs are widely scattered throughout the U.S.<sup>16,30-32</sup> According to data from the 2010 Census, New Jersey's Asian population grew by more than 1,400 percent since 1970. The counties with the largest Asian American populations are Middlesex (24% of the county's residents), Bergen (16%), and

1 Dementia Recruitment Minority

10

2  
3  
4 Hudson (15%) in NJ. We choose NJ to carry out this pilot ACAD since the highest density of  
5  
6 KAs (6.3%) resides in Bergen County, NJ. <sup>32,33</sup>

## 9 **Sociocultural Contexts of Korean Americans**

10  
11 The history and socio-demographic characteristics of Korean immigration frames the  
12 sociocultural context of KAs, the majority of whom were not born in the U.S.<sup>30-32</sup> Roughly 10%  
13  
14 of Asian American Pacific Islanders are KAs. There are two major paths for Korean immigration  
15  
16 to the U.S.: to reunite with other family members already here or to offer professional and  
17  
18 technical skills in demand in the U.S. <sup>30,31</sup> The majority of KA immigrants rated their English  
19  
20 level as “minimum” and do not speak English at home regardless of their length of residence in  
21  
22 this country. <sup>21,22, 30-34</sup> KA older adults reported relatively high levels of education, but not  
23  
24 comparable levels of professional jobs. Studies of KAs have revealed that 30% to 40% are self-  
25  
26 employed <sup>30,33-36</sup> which explains their relatively low rate of health insurance which is between  
27  
28 42% and 51%.<sup>30,37-39</sup>

## 35 **Data Source for GIS**

36  
37  
38 We incorporated a grey literature search to include a diverse and heterogeneous body of  
39  
40 material available outside of the traditional academic peer-review process. <sup>40-42</sup> Data estimation  
41  
42 of the study populations is mainly based on two sources: local KA community social data and  
43  
44 statistical data produced by the U.S. Census Bureau. Census data for the state of NJ were  
45  
46 extracted at the census tract geographical level using the American Community Surveys (ACS).  
47  
48 The ACS is a publicly available survey administered by the U.S. Census Bureau annually. Our  
49  
50 main socio-demographic data come from analyzing the 2015-2019 ACS 5-Year Estimates <sup>43</sup>

## Dementia Recruitment Minority

11

1  
2  
3  
4 from the Integrated Public Use Microdata Series.<sup>44</sup> However, we also utilized aggregated data for  
5  
6 the 2011, 2015, and 2019 ACS retrieved from the data.census.gov website.<sup>45</sup>  
7

8  
9       Census aggregate data sets are typically large enough to cover state or county level  
10  
11 geographic areas, but they are limited in content for small sized of racial/ethnic groups such as  
12  
13 KAs. Therefore, we utilized a community participatory mapping approach to harness existing  
14  
15 community resources to develop target group-tailored GIS. This participatory GIS relies on the  
16  
17 integration of local perspective and knowledge about community capacity of conducting this  
18  
19 proposed study.<sup>46-48</sup> We obtained expert consultation from community leaders, cultural  
20  
21 navigators, and key informants with knowledge about ADRD, patterns of residence, health care  
22  
23 use, and social activities of KA older adults. We used search keywords in both English and  
24  
25 Korean such as Korean Americans (재미한국인) or Korean church (한인교회). We tried to use  
26  
27 compound nouns such as Korean-American instead of Korean so that the findings were not from  
28  
29 Korea. We also traced the community list in a hard copy by working with community leaders.  
30  
31 Based on collaboration, we developed the list of local data sets including ethnic churches (from  
32  
33 the Korean Catholic Peace Times Weekly<sup>49</sup> and Christian Daily<sup>50</sup>), and ethnic clinics (from the  
34  
35 Korean Daily Service<sup>51</sup>). Regarding health services related to ADRD management, we searched  
36  
37 websites for AD Research Centers (ADRCs) in the NYC and NJ regions and found that there are  
38  
39 no institutions providing Korean-specific services. However, we have found a large number of  
40  
41 Korean-serving medical clinics in NJ through our own community-based searches.<sup>51</sup> We then  
42  
43 mapped the locations of these ethnic community resources to create our own community maps  
44  
45 and incorporated them into community outreach activities.  
46  
47  
48  
49  
50  
51

**Analysis**

In analyzing the county-level data from the ACS, we compared different socioeconomic characteristics among selective race/ethnic groups (White, Asians, Koreans, and Chinese) as well as between two age groups (ages 25-64 and 65 and up) within the KA population. In addition to illustrating demographic trends in the study area, we examined the levels of poverty, educational attainment, and limited English proficiency given their crucial impact on one's health condition, health care access, and research participation. For these three socioeconomic characteristics, we also included data for all adults (ages 25 and up) to provide general understanding of our samples (see Table 1). While the census data have large sample sizes to perform multiple between- and within-group comparisons, data from some counties were automatically excluded from analyses (counties with no color in figures). For our geo-spatial analyses, we utilized multiple GIS data sets including the distribution patterns of KA older adult populations, Korean preferred senior apartments, and locations of churches and clinics to integrate spatial and non-spatial (tabular) data sources of U.S. census demographic data.

### **Recruitment Plan**

Recruitment of Asian American research participants presents challenges, and one needs to develop innovative target-population tailored strategies instead of utilizing methods developed by and for the mainstream population.<sup>45,52-54</sup> Thus, we developed a decolonizing recruitment approach to recruit participants from the community as a part of the ACAD cohort study to evaluate a novel CBPR sampling method using GIS maps to visualize unique patterns and trends of distribution of the study population who are disproportionately understudied and under-served. The decolonizing recruitment methods is an approach challenging the Eurocentric research methods pertaining to the norms of methodological conceptualization of conformity that

undermine the local knowledge and experiences and disproportional socio-cultural characteristics of the marginalized study population groups.<sup>5,46,54-56</sup>

This project represents an academic-practice-community collaboration. Before beginning recruitment, we advertised in ethnic media and social networks to increase awareness and encourage participation in the study. We used "*Tell-A-Friend about Data is Power*" as an ad campaign to communicate the importance of having data from Koreans for Koreans. This recruitment strategy, using language and race matched recruiters and researchers,<sup>30,57-59</sup> would promote access to hard-to-reach KAs, and help participants to feel "listened to" and show the "value of their contribution to the study." As most KAs are connected and have ties to Koreans churches or senior associations, we utilized a chain referral sampling method, like other forms of respondent-driven sampling.<sup>30,60-63</sup> We asked the study participants to introduce us to other Korean American older adults and started with a small number of senior community leaders and cultural navigators who then recruited directly from their peers who go to the same churches or live in the same senior apartments. This approach leverages our well-established collaborations and coordination with a range of multilevel services and existing community capacity.

## Results

We created unique socio-spatial and cultural landforms of KA older adults in NJ and the degree to which they are similar or different from other ethnic groups as well as their younger KA counterparts who show higher income and higher English proficiency. The GIS maps shown in Figures 1 through 8 are based on data from both government and local data sets to identify the target sample and improve recruitment. Bergen County in NJ is a growing hub and home to the top five municipalities by percentage of KA populations.<sup>64</sup> Compared to the total population in NJ (Figure 1a), KAs are mostly concentrated in three counties (Bergen, Hudson, and Union) and



## Dementia Recruitment Minority

14

the highest density is in Bergen County (Figure 1b). The maps demonstrate that the study sites are located in population-dense areas of the KA subgroup, our study population, Bergen County. As indicated in Figure 2, there is a trend toward an increasing KA population in Morris County and Middlesex County from 2011 to 2019.

We have also found large numbers of Korean ethnic churches: 124 protestant churches and 11 Catholic churches are identified (Figure 3) and of KA serving medical clinics, most of them are concentrated in Bergen County, NJ (Figure 4).

**Figure 1. Population Density in New Jersey by County in 2019**

a. All Population

b. Korean population

Source: 2019 American Community Surveys 1 Year-Estimates, Census Bureau

**Figure 2. Changes in Korean Population in New Jersey by County in 2011, 2015, and 2019**

a. 2011

b. 2015

c. 2019

Sources: 2011, 2015, and 2019 American Community Surveys 1 Year-Estimates, Census Bureau

**Figure 3. Number of Korean Churches in New Jersey**

Sources: Korean Community Social Networking Service in New Jersey

**Figure 4. Number of Clinics with Korean-Serving Providers in New Jersey**

Sources: Korean Community Social Networking Service in New Jersey

**Table 1: Demographic and Socioeconomic Characteristics among Selected Age and Race/Ethnic Groups in New Jersey**

Sources: 2015-2019 American Community Surveys 5-Year Estimates, Census Bureau

When analyzed by age we learned that KA older adults (>\_65 years) had higher poverty rates, lower educational levels, and more limited English proficiency levels than their White and Chinese American as well as their younger KA counterparts (Table 1 and Figures 5-8). These findings of low income and linguistic barriers were concordant with our community assessments that increasing presence of KA older adults residing in public senior apartments. We have learned that KA older adults preferred to live where a critical mass of KA reside and close to Korean markets and there was a waitlist to be moved into them. This understanding of geospatial trends of KA older adults housing helped us to design more precise recruitment efforts.

**Figure 5. Proportion of Population Ages 65 and Up with Elementary Schooling or Less among Selected Racial/Ethnic Groups in New Jersey**

a. Whites  
b. Koreans  
c. Chinese

Source: 2015-2019 American Community Surveys 5-Year Estimates, Census Bureau

**Figure 6. Proportion of Population Ages 65 and Up Below Poverty Level by Selected Race/Ethnic Groups in New Jersey**

a. Whites  
b. Korean  
c. Chinese

## Dementia Recruitment Minority

16

Source: 2015-2019 American Community Surveys 5-Year Estimates, Census Bureau

In particular, concerning education, only Hudson County had over 5% residents with reporting no education or only elementary education among White older adults, whereas several counties including Bergen County, Essex County, Middlesex County, Burlington County, and Camden County had over 5% reporting no or only elementary education among KA older adults (Figures 5a and 5b). We also investigated the different geographic distribution of poverty levels between ethnicities in NJ (Figure 6). Only one county (Hudson County) has over 6.8% below the poverty level and all other counties have less than 6.8% poverty levels among White older adults (Figure 6a). In contrast, a larger number of counties has over 6.8% of those living below the poverty level among KA and Chinese American older adults (Figure 6b and 6c). Bergen County, Union County, and parts of neighboring counties represented the areas with the highest level of poverty among KA older adults (Figure 6b), while Chinese American older adults living in the highest levels of poverty were primarily concentrated in Warren County and Somerset County (Figure 6c). Especially in Bergen County, although income levels are generally higher among the KA population, the older group has a higher poverty rate (25.1%) compared with the poverty level of 9.6% among all KA adults ages 25 and up, and others of the same age group of Whites (6.1%), Asian Americans (13.0%), and Chinese Americans (4.5%) (Table 1). Median income and English proficiency vary considerably among different age groups namely, those aged 25 to 64 and aged 65 and older in the KA population in NJ.

Generally, young Asian American adults have lower rates of English proficiency than other young adults in NJ. KA individuals have the lowest rates of English proficiency rates among all age groups (Table 1), and it was lower among KA older adults aged 65 and older compared to those aged between 25 and 64. For example, 58.1% of KAs aged 65 and over had

## Dementia Recruitment Minority

17

limited English proficiency, whereas 4.1% and 26.9% had limited English proficiency among Whites and Chinese Americans respectively.

Findings also revealed that KA older adults had relatively lower median household incomes than KA younger adults. In detail, while northern NJ including Bergen County, Hudson County, and Somerset County represented the area with over \$40,000 median income among KA younger adults (Figure 8a), KA older adults had below \$30,000 median income in most counties (Figure 8b).

### Figure 7. Percent of Korean Population with Limited English Proficiency by Different Age Groups in New Jersey

a. Ages 25-64

b. Ages 65 and Up

Source: 2015-2019 American Community Surveys 5-Year Estimates, Census Bureau

### Figure 8. Median Income of Korean Population by Different Age Groups in New Jersey

a. Ages 25-64

b. Ages 65 and Up

Source: 2015-2019 American Community Surveys 5-Year Estimates, Census Bureau

## Outcomes of Recruitment

Based on findings of clusters, we focused our recruitment effort in Bergen County, NJ. The recruitment utilizing GIS strategy we developed based on sociodemographic characteristics of KA older adults who are undereducated, have high poverty rates, and have limited English proficiency. We recruited participants from churches, senior apartments, and a Korean serving local neurologist clinic in Bergen County in order to find those without cognitive problems, with mild cognitive impairment, or with dementia from the community. We proactively identified

specific churches and senior apartments with a high density of Korean American older adults as well as a Korean-speaking neurologist and successfully recruited the aimed subjects earlier than the planned time frame. We found that most study participants resided within a defined recruitment priority area identified by GIS (Table 2; Figure 9). However, half of the participants recruited from clinical sites traveled a distance to Korean-speaking physicians, coming either from NY or suburban areas in NJ.

**Figure 9: Geographic Distribution of the Participants by Different Recruitment Sites**

**Table 2. Geographic Distribution of the Participants by Recruitment Sites**  
**Discussion**

We reached our goal of recruiting 60 KA individuals within the proposed period. Our successful recruitment of KA older adults, a hard-to-reach population, is due to our novel CBPR with multiple recruitment strategies including a target population tailored GIS, a detailed understanding of the target population as well as existing community capacity, and a respected relationship between community and researchers.<sup>64-68</sup> Our pilot data suggests that the target population is interested in participating in clinical studies and our approach would contribute to greater awareness of the important role of the community-based GIS recruitment method so that knowledge generated from this study can be used to inform planning and implementation of future studies with other Asian American older adults or other immigrant populations.

Over 15 million older adults aged 65 and older are economically insecure, with incomes below 200% of the federal poverty level.<sup>69</sup> Our findings reveal that KA older adults have distinct socioeconomic characteristics such as higher levels of poverty, lower education levels, and lower

## Dementia Recruitment Minority

19

English proficiency levels compared with their younger generation counterparts (ages 25-64) than other racial/ethnic groups such as White and Chinese. These important differences make it more difficult for the KA older adults to access healthcare facilities compared to other ages and ethnic groups. Most KA older adults live in Bergen County, NJ, which borders NYC and is in the top five municipalities with KAs as a percentage of the overall population according to 2010 Census Data.<sup>70</sup> The study findings show that a GIS is useful to: 1) conveniently identify and quantify as well as cluster potentially eligible participants in a targeted geographic area; 2) visualize sociodemographic characteristics of KAs including age, poverty, education, and language; 3) visualize the resources of faith-based organizations and medical clinics. The geographic distribution of KAs is not evenly spread across the state, which is different from that of mainstream populations that might influence their access to health care and health research participation. Given the distinct sociocultural factors and high degree of local heterogeneity within geographic regions as well as a lack of data sets for small sized population, we have learned that conducting participatory GIS to address local level data deficiency for recruitment of KA older adults in NJ could be one solution to increase minority recruitments.

Most participants were recruited from KA dense areas, but the participants recruited from the clinical site did not all reside in KA dense areas but traveled a long distance to see the Korean speaking physician. With only a small number of Korean speaking physicians, ADRD patients or family caregivers are willing to travel a long distance to see culture and language matched health care professionals. The findings that no AD and dementia treating institutions provide KA-specific services even in NYC and Bergen County, NJ with a dense KA population points to the challenges KA older adults face with getting a dementia diagnosis and ADRD management. In the same vein, KA older adults inequitably share risks and benefits of clinical

research participation while it also makes it more difficult for researchers to recruit and study this under-served and under-represented group.

A GIS visual presentation of numeric sociodemographic data serves an important role in assessing the varied distribution of the KA minority (small sizes) and is a powerful tool for recruitment strategies to increase understanding of the heterogeneity of minority population distribution, which may not be easily observed in typical numeric data analysis. In addition to standard typical datasets, unique data from the community-based social network data based on geodemographics at the local level provides comprehensive data on KA older adults and neighborhoods. We think that it is an excellent strategy that community leaders who provide SNS information continue to be involved in identifying and recruiting potential participants and that they work with senior community leaders at KA senior dense apartments rather than general community leaders as they have closer relationships with older adults. The benefit of providing a multitude of datasets for GIS development is that the application can be directly integrated with the recruitment plans. Based on our findings, we will continue to develop a novel and human centered community-based recruitment plan for Asian American older adults residing in the community in NJ and the northeast.

### Implications

Our findings demonstrate the value of GIS for the recruitment of Asian American older adult immigrants through utilizing community resources. GIS findings provide a detailed knowledge of the spatial distribution of targeted population attributes of density, income, education, language, churches, and health care clinics for Korean speaking older adults. Moreover, the detailed spatial datasets help us to strategically recruit our target population. Asian Americans have been often referred to as “model minorities” based on their relatively higher

## Dementia Recruitment Minority 21

median income and educational levels compared to other racial/ethnic groups in the U.S.<sup>12,16,70,71</sup> but within these groups, a huge variation in income and linguistics exist.<sup>30,72,72</sup> We showed this heterogeneity by disaggregating demographic, socioeconomic, and cultural characteristics of KAs who otherwise could have been overlooked. Health care and clinical studies for older adult immigrants are particularly challenged by difficulties in recruitment due to low education levels, low economic status and low English proficiency and their impact on recruitment should be addressed and further studied. However, developing and implementing GIS by health care researchers is not possible if there is no existing spatial data on the targeted populations. But in reality, there is a lack of community-based social network data for Asian Americans, especially the dataset that disaggregates Asian American subgroups.<sup>73</sup> Most population data tend to not collect relatively small-sized samples of Asian American subgroups; thus, it cannot be meaningfully used in GIS development. As a result, we created an innovative method of local community engagement to capture spatial data about the distribution of churches and KA serving healthcare clinics. These CBPR approaches based on respect for local knowledge and recognizing that the communities can make a critical contribution by creating and changing things.<sup>18,55,64-66,74</sup>

This approach responds to the call from the National Institute on Aging (NIA) to develop strategies to improve the health status of older adults in diverse populations. Results from the full-scale ACAD study will provide health researchers and policymakers with practical evidence on how to identify and increase the participation of Asian American older adults in clinical studies that could be used as a national model for reducing health and research disparities among minority older adult populations. Moreover, this study highlights the importance of GIS



1  
2  
3  
4  
5  
6  
7  
8  
9  
10  
11  
12  
13  
14  
15  
16  
17  
18  
19  
20  
21  
22  
23  
24  
25  
26  
27  
28  
29  
30  
31  
32  
33  
34  
35  
36  
37  
38  
39  
40  
41  
42  
43  
44  
45  
46  
47  
48  
49  
50  
51  
52  
53  
54  
55  
56  
57  
58  
59  
60

Dementia Recruitment Minority

application in public health studies and has major implications for our understanding of the heterogeneity of minority population distribution and community outreach efforts.

For peer review only

1 Dementia Recruitment Minority

23

2  
3  
4 **Acknowledgments**

5 The work is supported by NIA (R56AG069130), Asian Cohort for Alzheimer's Disease  
6 (ACAD).  
7

8  
9 We are indebted to Korean American community health leaders, and the ACAD research group  
10 who made this study possible.  
11  
12  
13  
14  
15  
16  
17  
18  
19  
20  
21  
22  
23  
24  
25  
26  
27  
28  
29  
30  
31  
32  
33  
34  
35  
36  
37  
38  
39  
40  
41  
42  
43  
44  
45  
46  
47  
48  
49  
50  
51  
52  
53  
54  
55  
56  
57  
58  
59  
60

### Reference

1. Alzheimer's Association, 2019 Alzheimer's Disease Facts and Figures, *Alzheimers Dement* 2019;15(3):321-87.
2. Matthews KA, Xu W, Gaglioti AH, et al. Racial and ethnic estimates of Alzheimer's disease and related dementias in the United States (2015-2060) in adults aged  $\geq 65$  years. *Alzheimers Dement*. 2019;15(1):17-24.
3. Shin JH. Dementia Epidemiology Fact Sheet 2022. *Ann Rehabil Med*. 2022;46(2):53-59.
4. WHO. World Health Organization Fact sheets of dementia 2022 September. Available: <https://www.who.int/news-room/fact-sheets/detail/dementia>
5. Chin AL, Negash S, Hamilton R. Diversity and disparity in dementia: The impact of ethnoracial differences in Alzheimer's disease. *Alzheimer Dis Assoc Disord*. 2011;25(3):187.
6. Raman R, Quiroz YT, Langford O, et al. Disparities by Race and Ethnicity Among Adults Recruited for a Preclinical Alzheimer Disease Trial. *JAMA Netw Open*. 2021;4(7):e2114364.
7. Kunkle BW, Grenier-Boley B, Sims R, et al. Genetic meta-analysis of diagnosed Alzheimer's disease identifies new risk loci and implicates A $\beta$ , tau, immunity and lipid processing. *Nat Genet*. 2019;51(9):1423-1424.
8. Thornton LR, Amorrortu RP, Smith DW, et al. Exploring willingness of elder Chinese in Houston to participate in clinical research. *Contemp Clin Trials Comm*. 2016;4:33-8.
9. Ma GX, Seals B, Tan Y, et al. Increasing Asian American participation in clinical trials by addressing community concerns. *Clin Trials*. 2014;11(3):328-35.
10. George S, Duran N, Norris K. A systematic review of barriers and facilitators to minority research participation among African Americans, Latinos, Asian Americans, and Pacific islanders. *Am J Public Health*. 2014;104(2):e16-31.
11. Colby S, Ortman J. Projections of the size and composition of the US population: 2014 to 2060 (Current Population Reports, P25-1143). Washington, DC: US Census Bureau; 2017 Accessed January 2023.
12. National Asian Pacific Center of Aging (NAPCA). Asian Americans and Pacific Islanders in the United States Aged 65 Years and Older: Population, Nativity, and Language. Data Brief, 2013;1(3):1-9.
13. Faison W E, Schultz S K, Aerssens J, et al. Potential ethnic modifiers in the assessment and treatment of Alzheimer's disease: challenges for the future. *Intern Psychogeriatric*. 2007;9(3):539-58.
14. Lim S, Mohaimin S, Min D, et al. Alzheimer's disease and its related dementias among Asian Americans, Native Hawaiians, and Pacific Islanders: A scoping review. *J Alzheimers Dis*. 2020;77(2):523-537.
15. DHHS. Healthy People 2020: Topics & Objectives: Dementia including AD. DIA-1 Data Details, 2018. Available <https://www.healthypeople.gov/node/3517/data-details>.
16. Hoeffel EM, Rastogi S, Kim, MO, et al. The Asian population: 2010 2010 census briefs. Available: <https://www.census.gov/prod/cen2010/briefs/c2010br-11.pdf>
17. Lee S, Martinez G, Ma GX, et al. Barriers to health care access in 13 Asian American communities. *Am J Health Behav*. 2010;34(1):21-30.

18. Lee, H. & Baik, SY. Health disparities or data disparities: sampling issues in hepatitis B Virus infection among Asian American Pacific Islander studies. *Appl Nurs Res.* 2011; 24 (2):e9-e15.
19. Quay TAW, Frimer L, Janssen PA, *et al.* Barriers and facilitators to recruitment of South Asians to health research: a scoping review. *BMJ Open* 2017;7:e014889. doi:10.1136/bmjopen-2016-014889
20. HUGO Pan-Asian SNP Consortium, Abdulla MA, Ahmed I, *et al.* Mapping human genetic diversity in Asia. *Science.* 2009;11;326(5959):1541-15455.
21. Lee S, Kim D, Lee H. Examine Race/Ethnicity Disparities in Perception, Intention, and Screening of Dementia in a Community Setting: Scoping Review. *Int J Environ Res Public Health.* 2022;19(14):8865.
22. Lee H, Kim D, Jung A, *et al.* Ethnicity, Social, and Clinical Risk Factors to Tooth Loss among Older Adults in the U.S., NHANES 2011-2018. *Int J Environ Res Public Health.* 2022;19(4):2382.
23. Disse E, Ledoux S, Bétry C, *et al.* An artificial neural network to predict resting energy expenditure in obesity. *Clin Nutr.* 2018;37(5):1661-1669.
24. Ha H. Using geographically weighted regression for social inequality analysis: association between mentally unhealthy days (MUDs) and socioeconomic status (SES) in U.S. counties. *Int J Environ Health Res.* 2019;29(2):140-153.
25. Ha, H.; & Wanyun, S. A spatial epidemiology case study of mentally unhealthy days (MUDs): air pollution, community resilience, and sunlight perspectives. *Int J Environ Health Res.* 2019;31(5):491-506.
26. Rushton G. Public health, GIS, and spatial analytic tools. *Annu Rev Public Health.* 2003;24:43-56.
27. Solis-Paredes M, Estrada-Gutierrez G, Perichart-Perera O, *et al.* Key clinical factors predicting adipokine and oxidative stress marker concentrations among normal, overweight and obese pregnant women using artificial neural networks. *Int J Mol Sci.* 2017;19(1):86.
28. Cain KL, Salmon J, Conway TL, *et al.* International physical activity and built environment study of adolescents: IPEN adolescent design, protocol and measures. *BMJ Open* 2021;11:e046636.
29. Wang F. Why Public Health Needs GIS: A Methodological overview. *Ann GIS.* 2020;26(1):1-12.
30. Lee HO, Lee OJ, Kim S, *et al.* Differences in knowledge of hepatitis B among Korean immigrants in two cities in the rocky mountain region. *Asian Nurs Res (Korean Soc Nurs Sci).* 200;1(3):165-75
31. Min. P. Caught in the middle: Korean communities in NY and LA. University of CA Press. 1996
32. Pew Research Center. Korean in the U.S. Fact Sheet 2021, Available: <https://www.pewresearch.org/social-trends/fact-sheet/asian-americans-koreans-in-the-us/>

33. Wu SY. NJ Labor Market Views: New Jersey's Asian Population by Asian Group: 2010. New Jersey Labor Market & Demographic Research (N.J. LMDR). 2012, Issue #18. Available: [https://nj.gov/labor/lpa/pub/lmv/lmv\\_18.pdf](https://nj.gov/labor/lpa/pub/lmv/lmv_18.pdf)
34. Li J, Maxwell AE, Glenn BA, et al. Healthcare access and utilization among Korean Americans: The mediating role of English use and proficiency. *Int J Soc Sci Res*. 2016; 4(1):83-97.
35. Min PG, Andrew K. The middleman minority characteristics of Korea immigrants in the United States. *Korean Popul Devel*. 1994;23(2):179-202.
36. Min, PG, Kim C. The Changing effect of education on Asian immigrants' self-employment. *Sociolog Inq*. 2018;88:435-466.
37. Brown ER, Ojeda VD, Wyn R. et al. Racial and ethnic disparities in access to health insurance and health care. Los Angeles: UCLA Center for Health Policy Research, 2000. Available: <http://escholarship.org/uc/item/4sf0p1st>
38. Shin H, Song H, Kim J, et al. Insurance, acculturation, and health service utilization among Korean Americans. *J Immigr Health*. 2005;7(2):65-74.
39. Yoo G, Kim B. Korean immigrants and health care access: Implications for the uninsured and underinsured. *Res Soci Heal Care*. 2007;25: 77-94.
40. Adams RJ, Smart P, Huff AS. Shades of grey: Guidelines for working with the grey literature in systematic reviews for management and organizational studies. *Internat J Manag Rev*. 2017;19(4):432-454.
41. Benzie KM, Premji S, Hayden KA, et al. State-of-the-evidence reviews: Advantages and challenges of Including grey literature. *Worldviews Evid-Based Nurs*. 2006;3: 55-61.
42. Piggott-McKellar AE, McNamara KE, Patrick D, Nunn PD, et al. What are the barriers to successful community-based climate change adaptation? A review of grey literature. *Local Environ*. 2019; 24: 374 - 390.
43. U.S. Census Bureau. Selected demographic characteristics, 2015-2019 American Community Survey 5-year estimates. 2021. Available: <https://data.census.gov/cedsci/>
44. Ren JQ, Sakamoto A, Earl R. The growth and spatial assimilation of the Asian American population, 1860-2018. *Sociol Mind*. 2022;12:108-119
45. U.S. Census Bureau. 2011, 2015, 2019 American Community Survey 1 year estimates 2021. Available: <https://data.census.gov/cedsci/>
46. Büyüm AM, Kenney C, Koris A, et al. Decolonizing global health: if not now, when? *BMJ Global Health*. 2020;5:e003394.
47. McGill E, Egan M, Petticrew M, et al. Trading quality for relevance: nonhealth decision-makers' use of evidence on the social determinants of health. *BMJ Open* 2015;5:e007053.
48. Hutton NS., McLeod G, Allen TR. et al. Participatory mapping to address neighborhood level data deficiencies for food security assessment in Southeastern Virginia, USA. *Int J Health Geogr*. 2022; 21:17.
49. The Catholic Peace Time Weekly. The Catholic Peace Time Weekly Incorporation. 2022: Available: <https://peacetimesweekly.org/ny/main>

- 1  
2  
3  
4 50. Christian Daily: American Korean church address. 2022. Available:  
5 [https://kr.christianitydaily.com/address/list.htm?org\\_type=C&ch\\_state=NJ](https://kr.christianitydaily.com/address/list.htm?org_type=C&ch_state=NJ)
- 6  
7 51. Korean Daily Service: Korean Business Directory of NY & NJ. 2022. Available  
8 [https://haninyp.com/bbs/board.php?bo\\_table=9001&wr\\_id=46](https://haninyp.com/bbs/board.php?bo_table=9001&wr_id=46)
- 9  
10 52. Shaghghi A, Bhopal RS, Sheikh A. Approaches to recruiting 'hard-to-reach' populations  
11 into re-search: a review of the literature. *Health Promot Persp*. 2011;1(2):86–94.
- 12  
13 53. Hwang D A, Lee A, Song J M, et al. Recruitment and retention strategies among racial  
14 and ethnic minorities in web-based intervention trials: Retrospective qualitative  
15 analysis. *J Med Internet Res*. 2021;23(7):e23959.
- 16  
17 54. Islam NS, Khan S, Kwon S, et al. Methodological issues in the collection, analysis, and  
18 reporting of granular data in Asian American populations: historical challenges and  
19 potential solutions. *J Health Care Poor Underserved*. 2010;21(4):1354-81.
- 20  
21 55. Datta R. Decolonizing both researcher and research and its effectiveness in Indigenous  
22 research. *Res Ethi*. 2018;14(2):1–24.
- 23  
24 56. Zavala M. What do we mean by decolonizing research strategies? Lessons from  
25 decolonizing, indigenous research projects in New Zealand and Latin America. *Decolon:*  
26 *Indigen Edu Socie*. 2013;2(1):55–71.
- 27  
28 57. Sadler RC, Hippensteel C, Nelson V, et al. Community-engaged development of a GIS-  
29 based healthfulness index to shape health equity solutions. *Soc Sci Med*. 2019; 227:63-  
30 75.
- 31  
32 58. Sharma M, Koh D. Korean Americans in Los Angeles: Decentralized concentration and  
33 socio-spatial disparity. *Geograp Rev*. 2019;109(3): 356-381.
- 34  
35 59. Chao SZ, Lai NB, Tse MM, et al. Recruitment of Chinese American elders into dementia  
36 research: the UCSF ADRC experience. *The Gerontologist*. 2011;51(Sup1):S125–133.
- 37  
38 60. Park C, Jang M, Nam S, et al. Church-based recruitment to reach Korean immigrants:  
39 An integrative review. *Western J Nurs Res*. 2018;40(9):1396-1421.
- 40  
41 61. Heckathorn DD, Respondent-driven sampling: A new approach to the study of hidden  
42 population. *Social Problems*. 1997;44(2):174–199.
- 43  
44 62. Badowski G, Somera LP, Simsiman B, et al. The efficacy of respondent-driven sampling  
45 for the health assessment of minority populations. *Canc Epi*. 2017;50(Pt B):214-220.
- 46  
47 63. Heckathorn DD. Respondent-driven sampling II: Deriving valid population estimates from  
48 chain-referral samples of hidden populations. *Soci Probl*. 2002;49(1):11–34.
- 49  
50 64. Shaghghi A, Bhopal RS, Sheikh A. Approaches to recruiting 'hard-to-reach' populations  
51 into re-search: A review of the literature. *Health Prom Persp*. 2011;20: 86-94.
- 52  
53 65. Field B, Mountain G, Burgess J, et al. Recruiting hard to reach populations to studies:  
54 breaking the silence: an example from a study that recruited people with dementia. *BMJ*  
55 *Open*. 2019;9:e030829.
- 56  
57 66. Lee HO, Lee OJ, Kim S, Hontz I, Warner A. Differences in knowledge of hepatitis B  
58 among Korean immigrants in two cities in the rocky mountain region. *Asian Nurs Res*.  
59 2007 Dec;1(3):165-75.
- 60

- 1  
2  
3  
4 67. Freire P. Creating alternative research methods: Learning to do it by doing it by doing it.  
5 In: Hall B, Gillette A, Tandon R (eds). *Creating knowledge: A monopoly*. New Delhi:  
6 *Socie Particip Res in Asia*.1982: 29-37.
- 7  
8 68. Van M. Ta Park, Oanh L. et al. A recruitment registry for Alzheimer's disease and related  
9 dementias, aging, and caregiver-related research, *ADs & Demen*, 2022, 10.1002/alz.12667.
- 10  
11 69. Cubanski, J., Koma, W., Damico, A, et al. How many seniors live in poverty? Henry J  
12 Kaiser Family Foundation. 2018: Available: [https://files.kff.org/attachment/Issue-Brief-](https://files.kff.org/attachment/Issue-Brief-How-Many-Seniors-Live-in-Poverty)  
13 [How-Many-Seniors-Live-in-Poverty](https://files.kff.org/attachment/Issue-Brief-How-Many-Seniors-Live-in-Poverty)
- 14  
15 70. U.S. Census Bureau. QuickFacts Bergen County, NJ. 2022. Available:  
16 <https://www.census.gov/quickfacts/fact/table/bergencountynewjersey/PST045221>
- 17  
18 71. Kawai Y. Stereotyping Asian Americans: the dialectic of the model minority and the  
19 Yellow Peril. *Howard J Commun*. 2005;16:109–30.
- 20  
21 72. Gordon N., Lin TY, Rau J. et al. Aggregation of Asian-American subgroups masks  
22 meaningful differences in health and health risks among Asian ethnicities: an electronic  
23 health record-based cohort study. *BMC Pub Heal*. 2019;19:1551
- 24  
25 73. Yom S. Lor M. Advancing health disparities research: The need to Include Asian  
26 American subgroup populations. *J Racial Ethn Health Disparities*. 2022;9(6):2248-2282.
- 27  
28 74. Lin CY, Loyola-Sanchez A, Boyling E, *et al*. Community engagement approaches for  
29 Indigenous health research: recommendations based on an integrative review. *BMJ*  
30 *Open* 2020;**10**:e039736. doi: 10.1136/bmjopen-2020-039736  
31  
32  
33  
34  
35  
36  
37  
38  
39  
40  
41  
42  
43  
44  
45  
46  
47  
48  
49  
50  
51  
52  
53  
54  
55  
56  
57  
58  
59  
60

**Table 1: Demographic and Socioeconomic Characteristics among Selected Age and Race/Ethnic Groups in New Jersey**

|                              | Total     | White     | All Asians | Korean | Chinese |
|------------------------------|-----------|-----------|------------|--------|---------|
| All Counties in NJ           | 8,878,503 | 4,915,451 | 826,767    | 97,127 | 157,323 |
| Bergen County, NJ            | 930,133   | 526,094   | 148,977    | 59,117 | 21,870  |
| Ages 25+                     |           |           |            |        |         |
| Elementary Education or Less | 2.6%      | 1.6%      | 2.2%       | 2.5%   | 2.2%    |
| Below Poverty                | 6.3%      | 4.9%      | 6.1%       | 9.6%   | 5.6%    |
| Limited English              | 6.5%      | 2.2%      | 14.8%      | 24.3%  | 13.2%   |
| Ages 65+                     |           |           |            |        |         |
| Population                   | 17.1%     | 22.0%     | 12.9%      | 13.5%  | 16.3%   |
| Elementary Education or Less | 5.1%      | 3.4%      | 7.2%       | 9.1%   | 6.4%    |
| Below Poverty                | 7.7%      | 6.1%      | 13.0%      | 25.1%  | 4.5%    |
| Limited English              | 11.1%     | 4.1%      | 37.1%      | 58.1%  | 26.9%   |

Sources: 2015-2019 American Community Surveys 5-Year Estimates, Census Bureau

**Table 2: Geographic Distribution of the Participants**

| Recruitment Sources         | N (%)    | Geographic Distribution                                     |
|-----------------------------|----------|-------------------------------------------------------------|
| Ethnic Churches             | 18 (30%) | NY (n=1), Bergen County (n=17)                              |
| Senior Apartment            | 27 (45%) | Bergen County (n=27)                                        |
| Korean-Speaking Neurologist | 15 (25%) | NY (n=4) & non-Bergen Counties (n=3)<br>Bergen County (n=8) |



Figure 1. Population Density in New Jersey by County in 2019

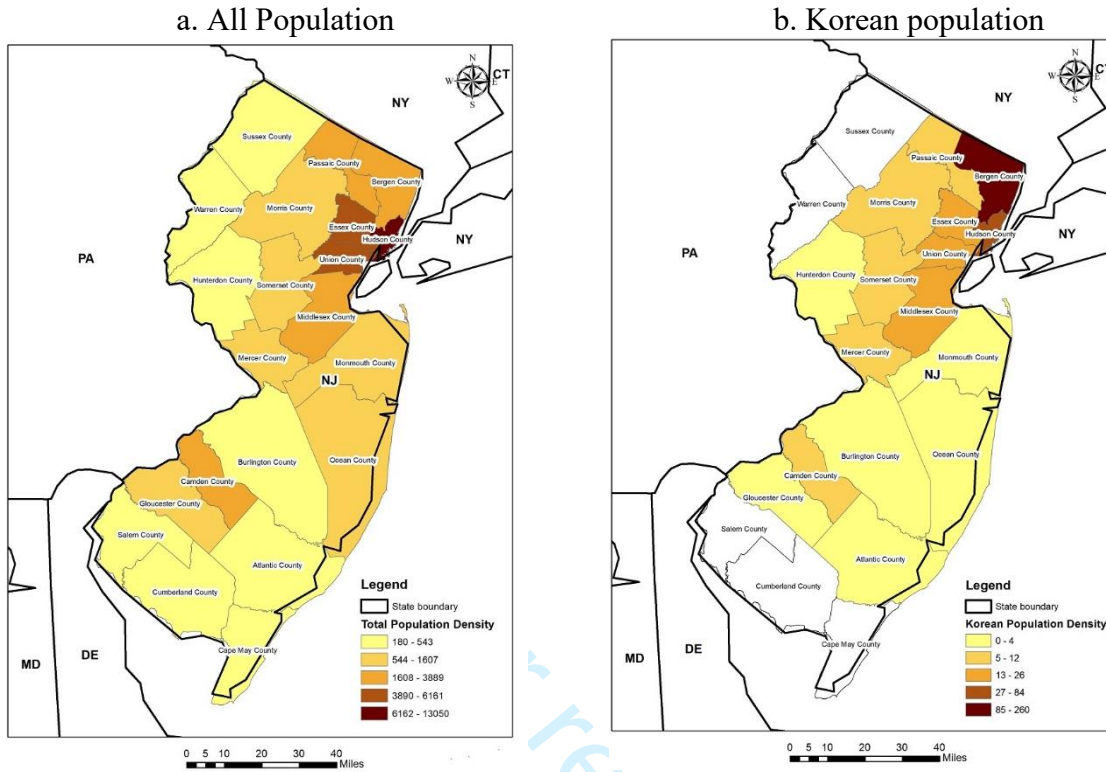

Source: 2019 American Community Surveys 1 Year-Estimates, Census Bureau

**Figure 2. Changes in Korean Population in New Jersey by County in 2011, 2015, and 2019**

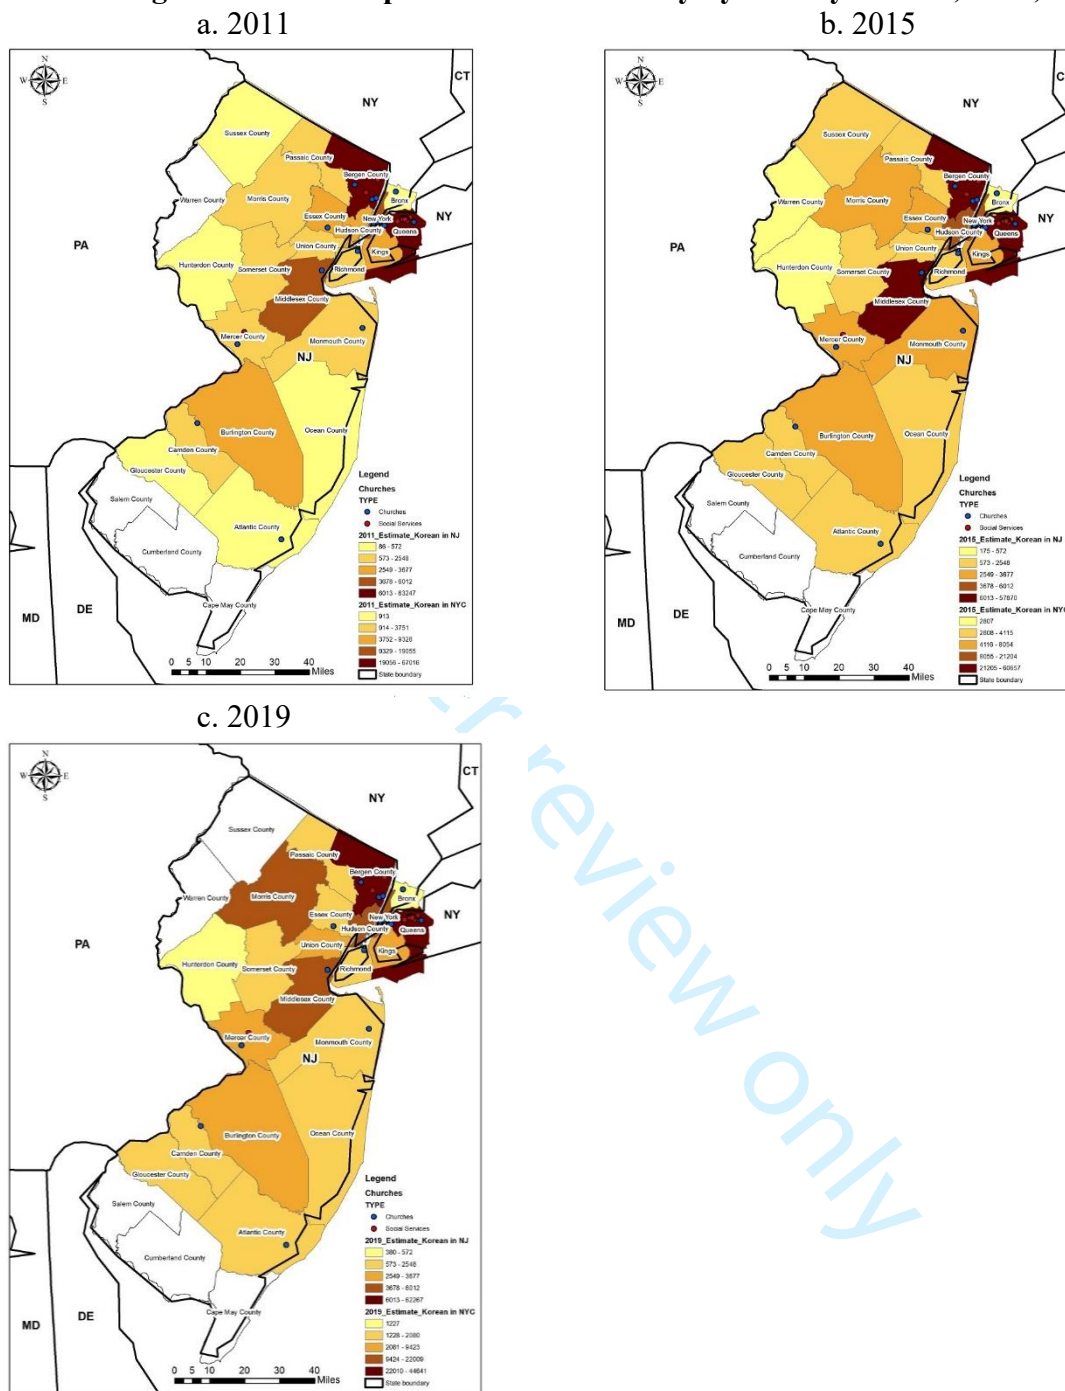

Sources: 2011, 2015, and 2019 American Community Surveys 1 Year-Estimates, Census Bureau

Figure 3: Number of Korean Churches in New Jersey

a. Catholic churches

b. Protestant churches

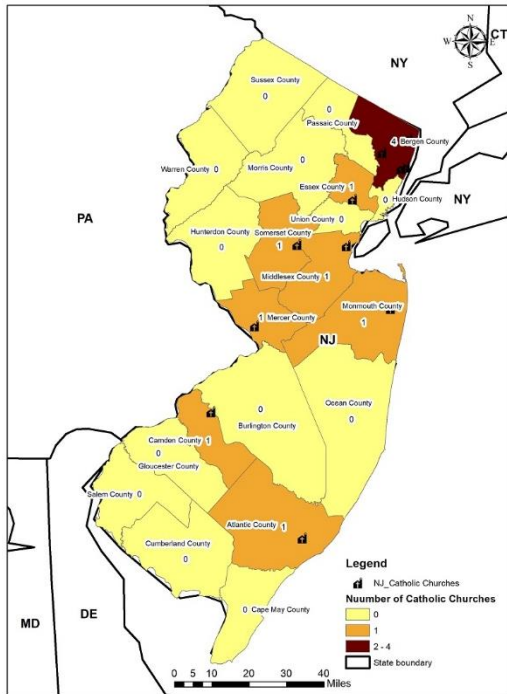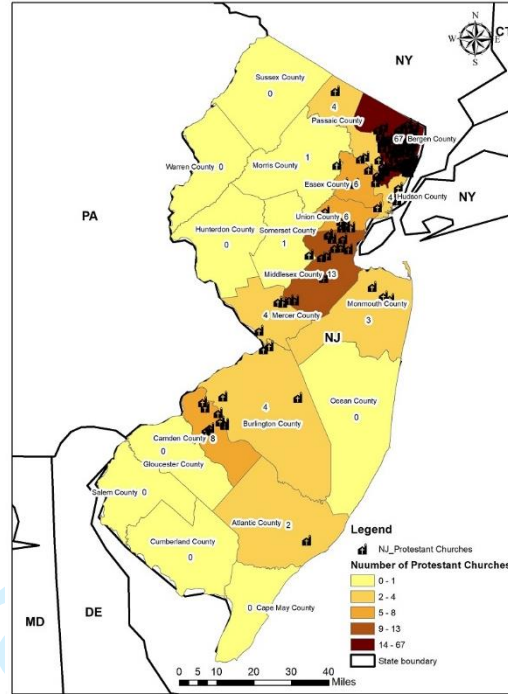

Figure 4. Number of Korean-Serving Clinics in New Jersey

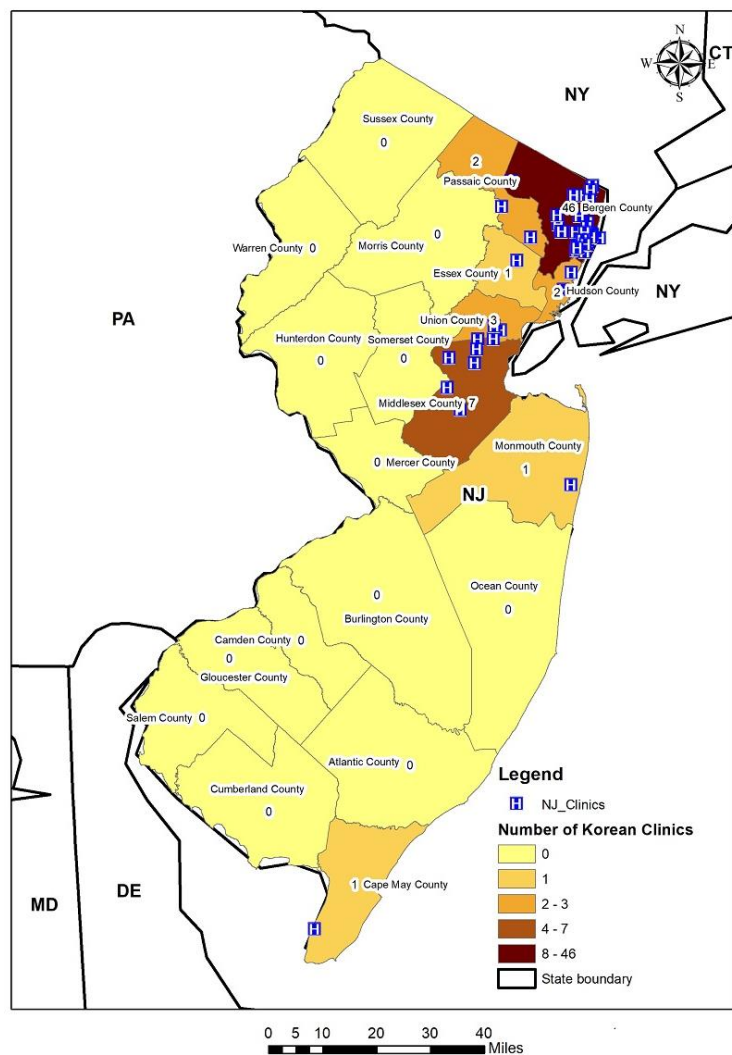

Sources: Korean Community Social Networking Service in New Jersey

**Figure 5. Proportion of Population Ages 65 and Up with Elementary Schooling or Less among Selected Racial/Ethnic Groups in New Jersey**

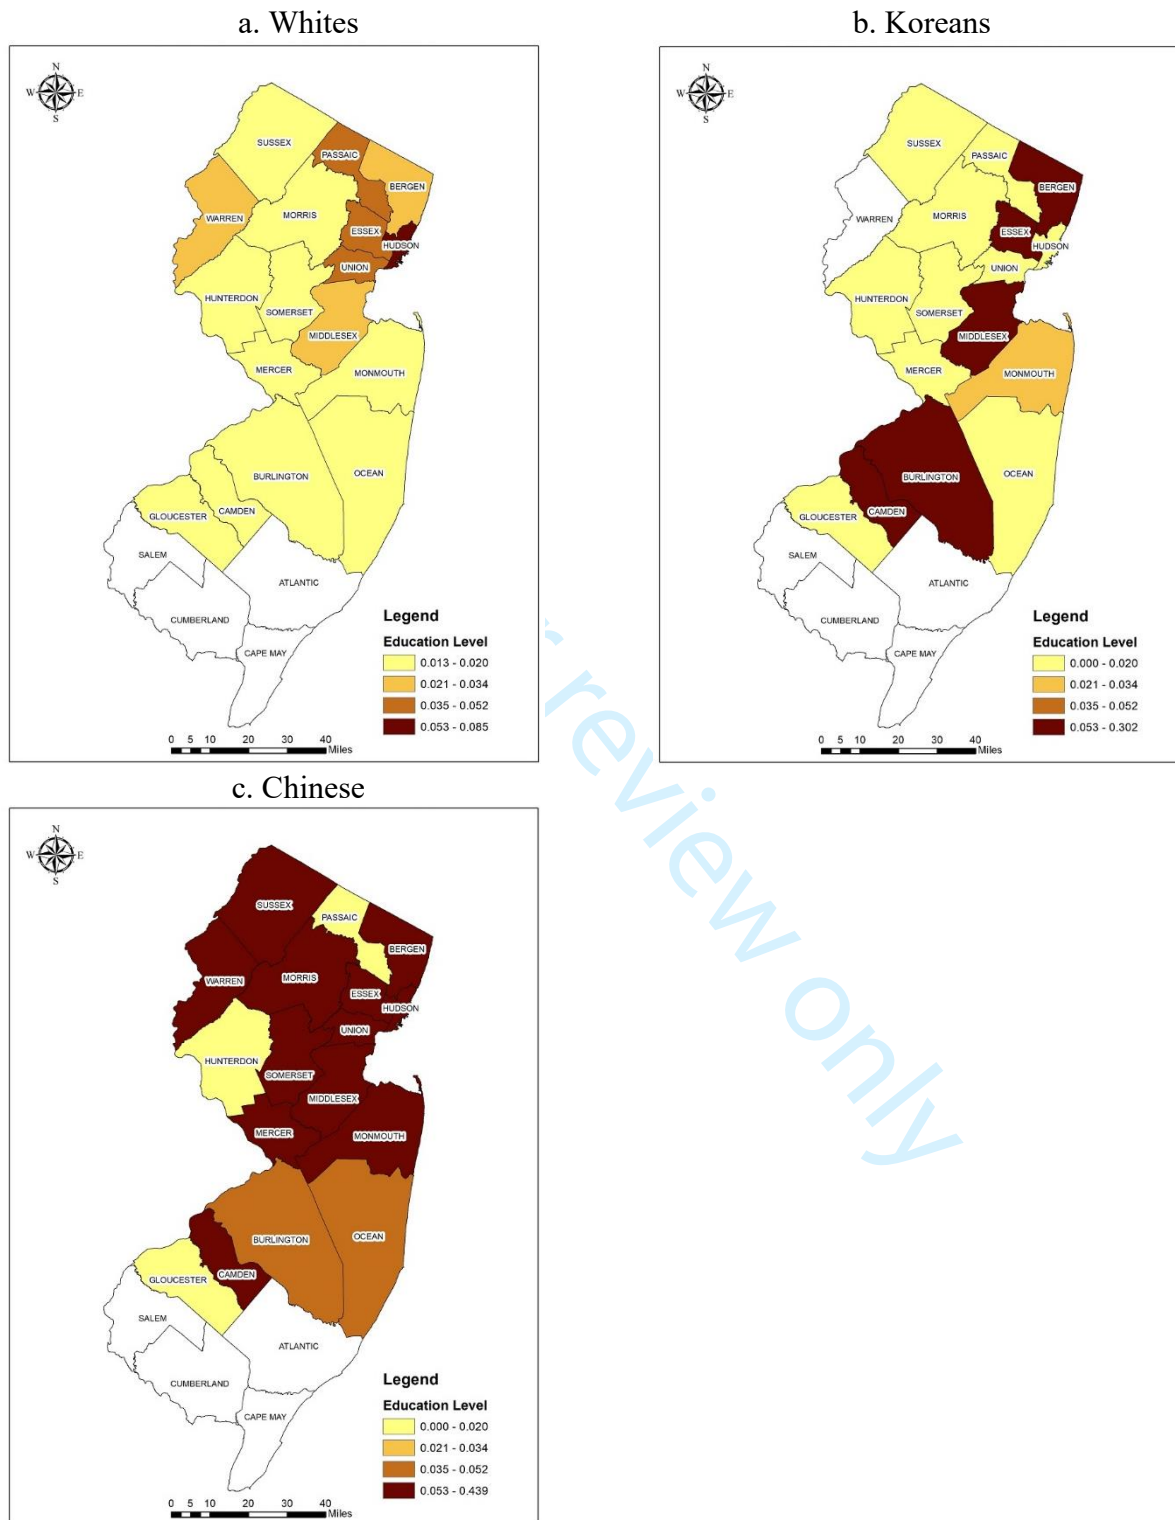

Source: 2015-2019 American Community Surveys 5-Year Estimates, Census Bureau

**Figure 6. Proportion of Population Ages 65 and Up Below Poverty Level by Selected Race/Ethnic Groups in New Jersey**

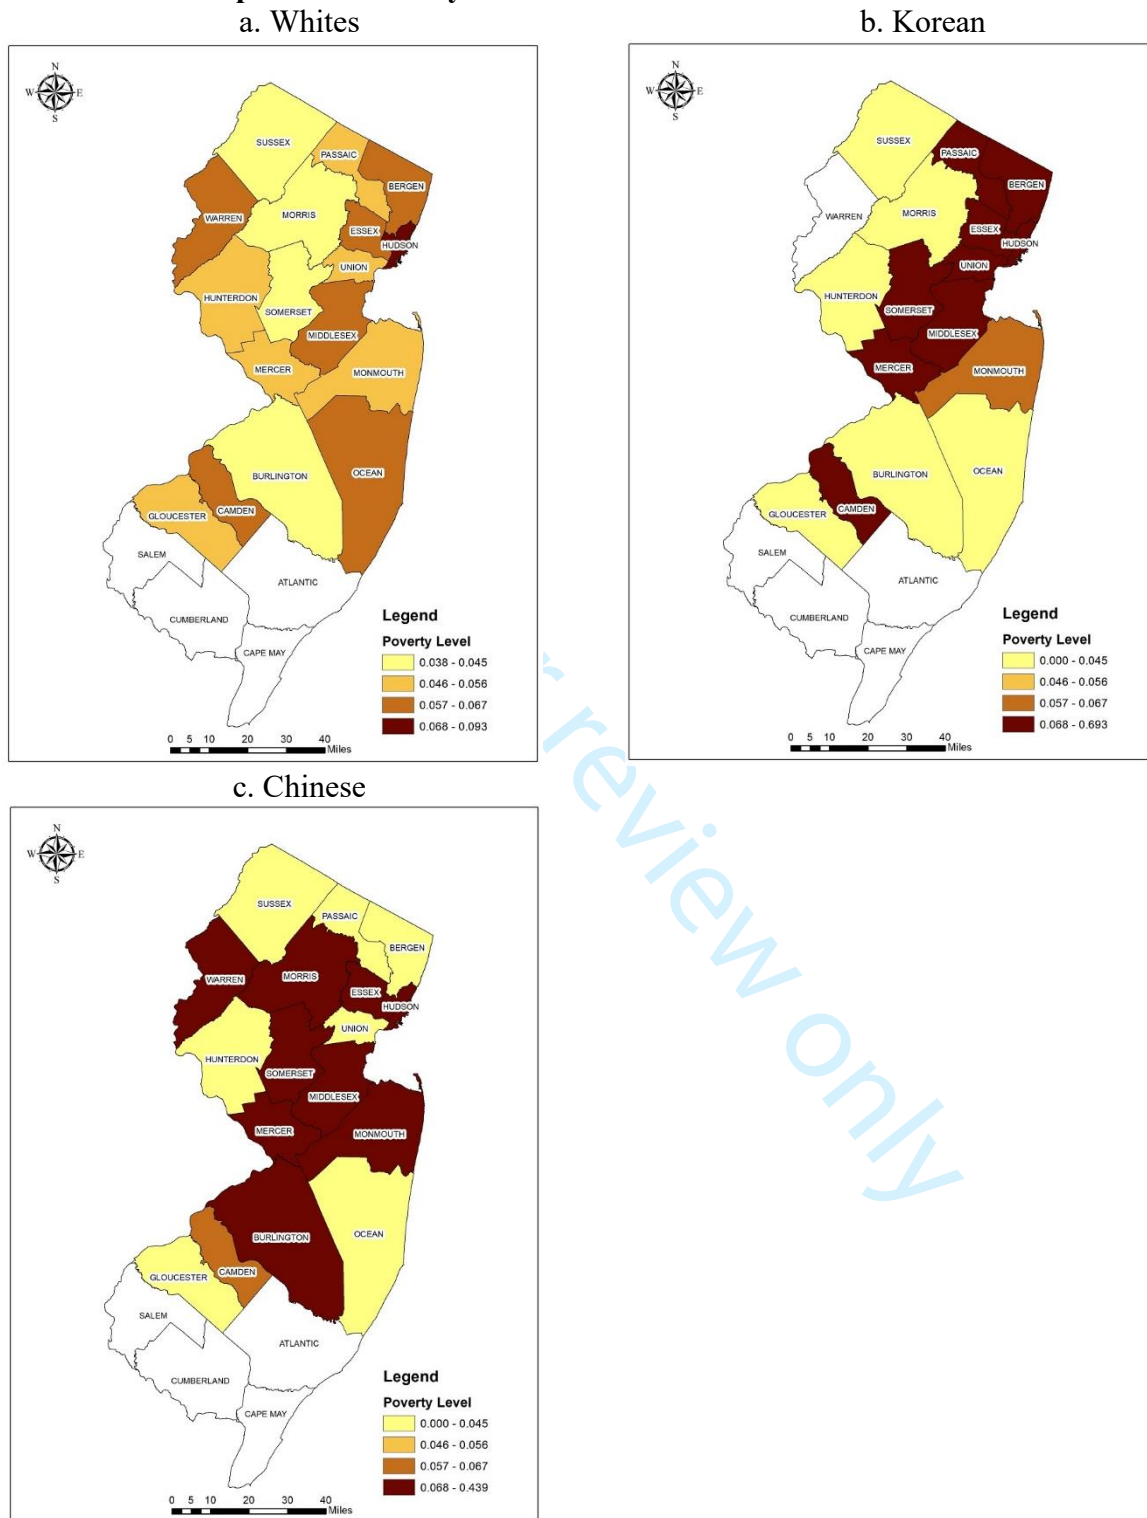

Source: 2015-2019 American Community Surveys 5-Year Estimates, Census Bureau

Figure 7. Percent of Korean Population with Limited English Proficiency by Different Age Groups in New Jersey

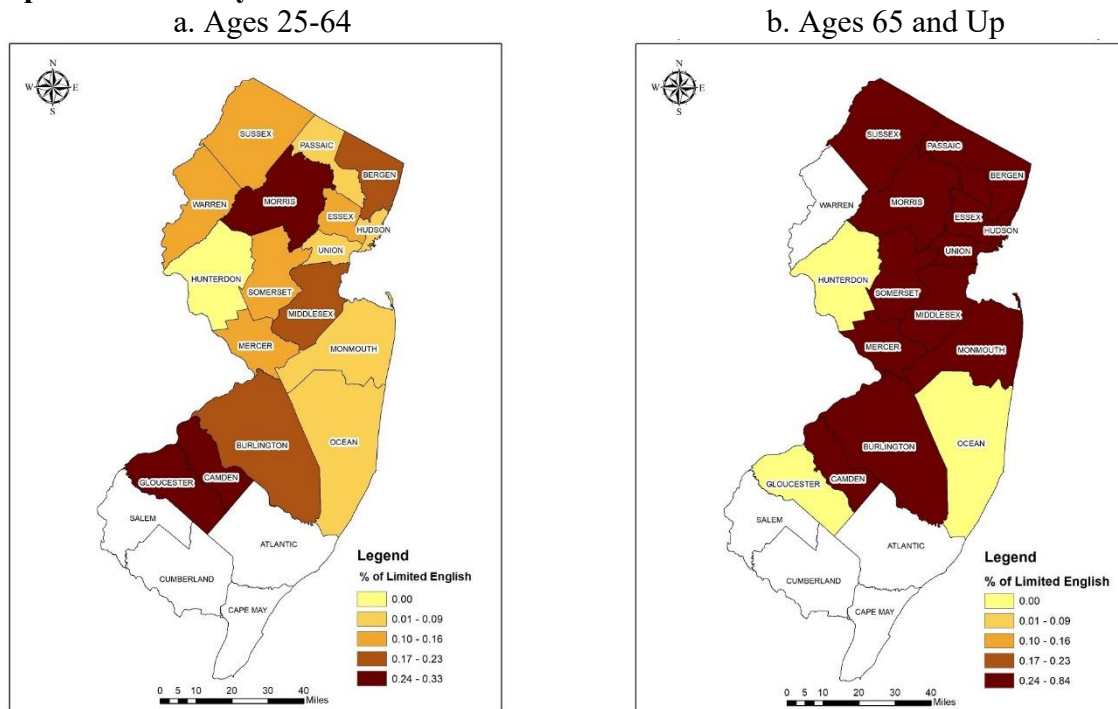

Source: 2015-2019 American Community Surveys 5-Year Estimates, Census Bureau

review only

**Figure 8. Median Income of Korean Population by Different Age Groups in New Jersey**

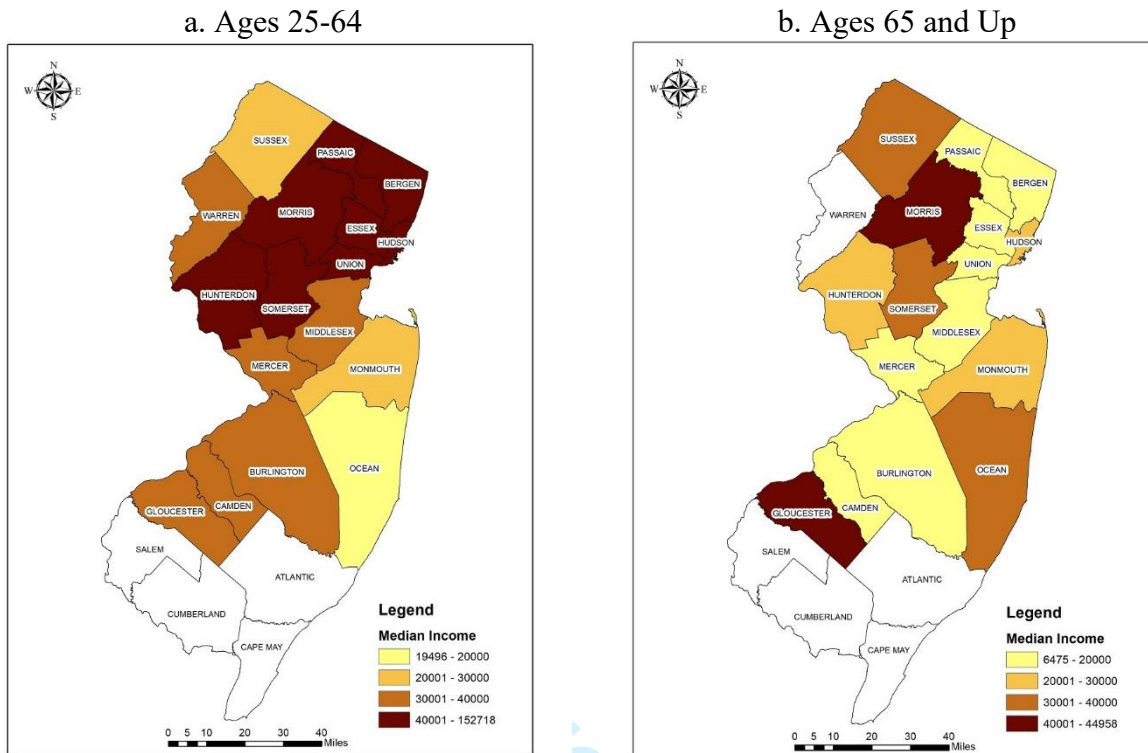

Source: 2015-2019 American Community Surveys 5-Year Estimates, Census Bureau



1  
2  
3  
4  
5  
6  
7  
8  
9  
10  
11  
12  
13  
14  
15  
16  
17  
18  
19  
20  
21  
22  
23  
24  
25  
26  
27  
28  
29  
30  
31  
32  
33  
34  
35  
36  
37  
38  
39  
40  
41  
42  
43  
44  
45  
46  
47  
48  
49  
50  
51  
52  
53  
54  
55  
56  
57  
58  
59  
60

**Figure 9: Geographic Distribution of the Participants by Different Recruitment Sites**

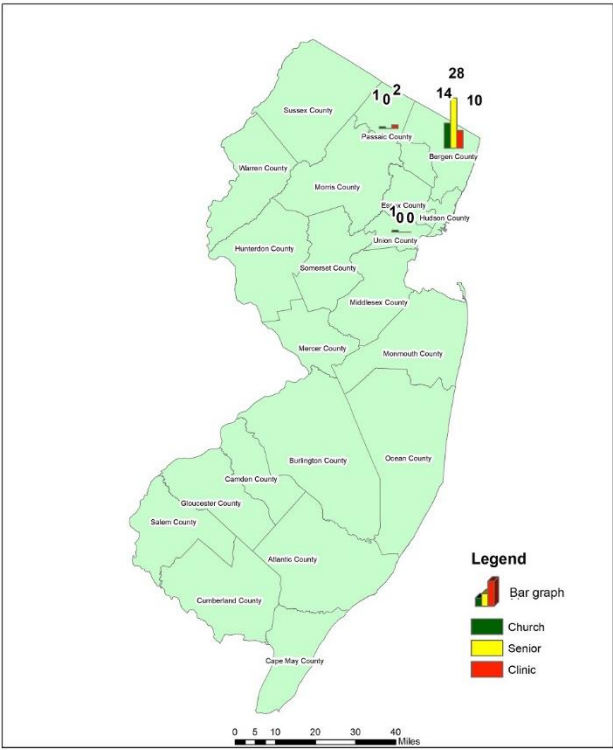

ew only

# BMJ Open

## Utilizing Community Based Geographic Information System (GIS) to Recruit Older Asian Americans in an Alzheimer's Disease Study

|                                 |                                                                                                                                                                                                                                                                                                                                                                                                                                                                                                                                                                                                                                                                                                                                                                                                                                                                                              |
|---------------------------------|----------------------------------------------------------------------------------------------------------------------------------------------------------------------------------------------------------------------------------------------------------------------------------------------------------------------------------------------------------------------------------------------------------------------------------------------------------------------------------------------------------------------------------------------------------------------------------------------------------------------------------------------------------------------------------------------------------------------------------------------------------------------------------------------------------------------------------------------------------------------------------------------|
| Journal:                        | <i>BMJ Open</i>                                                                                                                                                                                                                                                                                                                                                                                                                                                                                                                                                                                                                                                                                                                                                                                                                                                                              |
| Manuscript ID                   | bmjopen-2023-072761.R2                                                                                                                                                                                                                                                                                                                                                                                                                                                                                                                                                                                                                                                                                                                                                                                                                                                                       |
| Article Type:                   | Communication                                                                                                                                                                                                                                                                                                                                                                                                                                                                                                                                                                                                                                                                                                                                                                                                                                                                                |
| Date Submitted by the Author:   | 06-Jun-2023                                                                                                                                                                                                                                                                                                                                                                                                                                                                                                                                                                                                                                                                                                                                                                                                                                                                                  |
| Complete List of Authors:       | Lee, Haeok; New York University Rory Meyers College of Nursing, Nursing<br>Ha, Hoehun; Auburn University at Montgomery, Department of Biology and Environmental Science<br>Yim, Sejung ; CUNY The Graduate Center, Department of Sociology<br>Yang, Hyun-Sik ; Harvard Medical School Department of Neurology, Center for Alzheimer Research and Treatment<br>Lee, Veronica; Korean American Northeast Catholic Charismatic Renewal Association<br>Hong, Eunju; Korean American Association of Fort Lee<br>Chow, Tiffany; Alector, Inc.<br>Park, Van; University of California San Francisco, Department of Community Health Systems, School of Nursing,<br>Wang, Li-San; University of Pennsylvania Perelman School of Medicine, Department of Pathology and Laboratory Medicine<br>Jun, Gyungah; Boston University School of Medicine<br>Choi, Yun-Beom; Rutgers New Jersey Medical School |
| <b>Primary Subject Heading</b>: | Research methods                                                                                                                                                                                                                                                                                                                                                                                                                                                                                                                                                                                                                                                                                                                                                                                                                                                                             |
| Secondary Subject Heading:      | Epidemiology, Geriatric medicine, Public health, Health policy, Sociology                                                                                                                                                                                                                                                                                                                                                                                                                                                                                                                                                                                                                                                                                                                                                                                                                    |
| Keywords:                       | Aged, Dementia, Health Equity, EPIDEMIOLOGIC STUDIES, Patient Participation                                                                                                                                                                                                                                                                                                                                                                                                                                                                                                                                                                                                                                                                                                                                                                                                                  |
|                                 |                                                                                                                                                                                                                                                                                                                                                                                                                                                                                                                                                                                                                                                                                                                                                                                                                                                                                              |

SCHOLARONE™  
Manuscripts

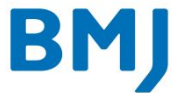

I, the Submitting Author has the right to grant and does grant on behalf of all authors of the Work (as defined in the below author licence), an exclusive licence and/or a non-exclusive licence for contributions from authors who are: i) UK Crown employees; ii) where BMJ has agreed a CC-BY licence shall apply, and/or iii) in accordance with the terms applicable for US Federal Government officers or employees acting as part of their official duties; on a worldwide, perpetual, irrevocable, royalty-free basis to BMJ Publishing Group Ltd ("BMJ") its licensees and where the relevant Journal is co-owned by BMJ to the co-owners of the Journal, to publish the Work in BMJ Open and any other BMJ products and to exploit all rights, as set out in our [licence](#).

The Submitting Author accepts and understands that any supply made under these terms is made by BMJ to the Submitting Author unless you are acting as an employee on behalf of your employer or a postgraduate student of an affiliated institution which is paying any applicable article publishing charge ("APC") for Open Access articles. Where the Submitting Author wishes to make the Work available on an Open Access basis (and intends to pay the relevant APC), the terms of reuse of such Open Access shall be governed by a Creative Commons licence – details of these licences and which [Creative Commons](#) licence will apply to this Work are set out in our licence referred to above.

Other than as permitted in any relevant BMJ Author's Self Archiving Policies, I confirm this Work has not been accepted for publication elsewhere, is not being considered for publication elsewhere and does not duplicate material already published. I confirm all authors consent to publication of this Work and authorise the granting of this licence.

## Abstract

**Objective:** is to show the usefulness of incorporating community-based Geographic Information System (GIS) in recruiting research participants for the Asian Cohort for Alzheimer's Disease (ACAD) study using the subgroup of Korean American (KA) older adults. The ACAD study is the first large study in the U.S. and Canada focusing on the recruitment of Chinese, Korean, and Vietnamese older adults to address the issues of underrepresentation of Asian Americans in clinical research.

**Methods:** To promote clinical research participation of racial/ethnic minority older adults with and without dementia, we utilized GIS by collaborating with community members to delineate boundaries for geographic clusters and enclaves of church and senior networks, and KA serving ethnic clinics. As well, we utilized socioeconomic data identified as recruitment factors unique to KA older adults which was analyzed for developing recruitment strategies.

**Results:** GIS maps show a visualization of the heterogeneity of the sociodemographic characteristics and the resources of faith-based organizations and KA serving local clinics. We addressed these factors that disproportionately affect participation in clinical research and successfully recruited the aimed participants (N=60) in the proposed period.

**Discussion:** Using a GIS map to locate KA provided innovative inroads to successful research outreach efforts for a pilot study that may be expanded to other underserved populations across the U.S. in the future. We will use this tool subsequently on a large-scale clinical genetic epidemiology study.

**Policy Implication:** This approach responds to the call from the National Institute on Aging (NIA) to develop strategies to improve the health status of older adults in diverse populations. Our study will offer a practical guidance to health researchers and policymakers in identifying

Dementia Recruitment Minority

understudied and hard-to-reach specific Asian American populations for clinical studies or initiatives. This would further contribute in reducing the health and research disparity gaps among older minority populations.

For peer review only

**Strengths and limitations**

- This study responds to the call from the NIA to build diverse community partnerships to improve the recruitment of minorities (Milestone 12.a). We did so to engage community and academic partners by developing community-based GIS to identify and recruit hard-to-reach populations.
- This study created novel community-based GIS maps which provide a comprehensive overview with a visual representation of the heterogeneities of social factors and physical clusters for the targeted population.
- Our successful recruitment of KA older adults is due to multiple recruitment strategies including target population tailored GIS, detailed understanding of the target population as well as existing community capacity and respected relationships between the community and researchers.
- Using publicly available social network data has inherent limitations related to completeness, correctness, and timeliness reporting and there are limitations to using social networks observed in social datasets which may be different from the underlying (offline) networks.
- Though recruitment to clinical studies with Asian American older adults is complex, only Korean speaking Korean American older adults are included.

## Introduction

Alzheimer's Disease and related dementia (ADRD) affects 5.8 million people in the U.S. and 50 million worldwide.<sup>1,2</sup> The annual global cost of dementia is now above \$1.3 trillion and is expected to rise to \$2.8 trillion by 2030.<sup>3,4</sup> The literature on ADRD shows constant and adverse health disparities as well as research disparities across racial and ethnic groups.<sup>5,6</sup> Though many AD variants are population-specific or have different frequencies across populations, like most complex diseases, the AD literature has a strong bias toward European ancestry<sup>6,7</sup>, and there are substantial disparities in minority participation in AD studies. Despite the call from the National Institute of Health (NIH) for the inclusion of more representative groups in clinical studies, racial/ethnic minorities, older adults, those with lower socioeconomic status, and immigrant subpopulations remain underserved, understudied, and underrepresented.<sup>6,8-10</sup>

Older racial/ethnic minority populations are growing faster than their non-Hispanic White counterparts and will comprise 45% of the older adult population by 2060.<sup>11</sup> The number of Asian Americans who are 65 years and older will increase by 352% by 2060 and comprise 21% of the total Asian American population by 2060.<sup>11,12</sup> Participation of Asian Americans in the ADRD interventional trials is very low (i.e., <1%)<sup>6,13,14</sup> and investigations of ADRD in Asian American populations are woefully inadequate, so the generalizability of scientific findings for Asian Americans is questionable. The availability of reliable data is imperative to the attainment of the regional profiles of health equity in the U.S.<sup>15</sup> However, in Healthy People 2020, as in most other national health reports, ADRD data about Asian Americans is absent. The main reasons for the omission of Asian Americans in health care studies are the barriers present in Asian American communities that include mistrust of outsiders, lack of knowledge, language barriers, lack of health insurance, and sociocultural barriers.<sup>9-12,16-19</sup> It is difficult to gain access

## Dementia Recruitment Minority

5

to Asian Americans because they are dispersed throughout the country and tend to have a low level of contact with the healthcare system. However, there are states where Asian Americans are concentrated such as California, New York, and Texas, and ethnic enclaves in various metropolitan areas such as Chinatown, Koreatown, and Little Saigon as well as based on social factors including churches.<sup>16-19</sup>

There is a need to develop sampling methods that are responsive to ethnicity and sociocultural diversity among study populations and to be able to generalize scientific findings for Asian Americans.<sup>9,10,18</sup> As for older Asian American populations, they show specific characteristics that make them different from other ethnic groups and their younger counterparts, including language, health beliefs, health attitudes, lower economic status, and social networks.<sup>17,19-22</sup> These characteristics may act as facilitators or barriers to participation in clinical studies or clinical trials for communities, including ADRD.

The strategies to identify geographical and socio-environmental trends among Asian Americans, particularly in the older population, may enhance the recruitment of the study participants. GIS would be an excellent tool for comparing spatial data on the relative concentrations of minority populations and identifying high-concentration areas or enclaves for the small sized study population. GIS can quickly and accurately create visual representations of multiple complex data sets. This makes it a more effective tool for developing recruitment strategies than other methods, such as text, charts, or tables. GIS could enhance the visual perception of physical and social environments by mapping layers of data information and its relationship to the location of the study population. The use of GIS techniques in public health studies has developed significantly in recent years.<sup>23-27</sup> Many public health researchers have found that visualization of the spatial distribution of health-related events of target populations



## Dementia Recruitment Minority

6

and making informed public health decisions faster are the two primary applications of GIS data/methods in health-related studies.<sup>25, 28, 29</sup> The applications of GIS methodologies in older adults' care and research are growing,<sup>30-32</sup> however, there is limited research on GIS in assessing recruitment strategies among older adults with and without dementia.<sup>33,34</sup>

The purpose of this paper is to show the usefulness of incorporating community-based GIS in recruiting research participants for the Asian Cohort for Alzheimer's Disease (ACAD) study using the subgroup of Korean American older adults. Community-based GIS recruitment strategies can help researchers and community recruiters work together to develop recruitment strategies by creating and mapping the data and monitoring the recruitment process and outcomes. The ACAD study is the first large study in the U.S. and Canada focusing on the recruitment of Chinese, Korean, and Vietnamese older adults to address the issue of underrepresentation of Asian Americans in research. The study's long-term goal is to recruit over 5,000 participants to identify genetic and non-generic/lifestyle AD risk factors and to establish blood biomarker levels for AD diagnosis. The ACAD study is approved by the Institutional Review Board of a university in the Northeast U.S.

This paper summarizes only the strategies used to recruit KA older adults aged 60 years and older in New Jersey in the U.S. and discusses how the community-based participatory research method combined with GIS resulted in the successful recruitment of our target research participant. Our main objective is to show the effectiveness of using community-based GIS to recruit a hard-to-reach KA elderly population with and without dementia in New Jersey by 1) creating a few GIS maps to capture the physical and sociocultural characteristics of the sample population and 2) referencing the maps to effectively recruit the sample population.

## Method

We used holistic community-based participatory research combined with applying GIS to delineate boundaries for geographic clusters and church and senior networks, and KA serving ethnic clinics within identified clusters or enclaves to recruit participants from the community.<sup>35</sup> We integrated local knowledge and resources of the social environment into GIS by collaborating with community leaders for developing recruitment strategies. Recruitment was derived from linking data from identified diverse sources of geographic and social enclaves of KA populations and visualized geographic and sociocultural trends in the study populations. A chain referral recruitment method within identified enclaves, like other forms of respondent-driven sampling, was utilized.

### Geographic Context of Korean Americans

Although there are concentrations of KAs in California and on the East Coast, KAs are widely scattered throughout the U.S.<sup>16,35-37</sup> According to data from the 2010 Census, New Jersey's Asian population grew by more than 1,400 percent since 1970. The counties with the largest Asian American populations are Middlesex (24% of the county's residents), Bergen (16%), and Hudson (15%) in New Jersey. We choose New Jersey to carry out this pilot ACAD since the highest density of KAs (6.3%) resides in Bergen County, New Jersey.<sup>37,38</sup>

### Sociocultural Contexts of Korean Americans

The history and socio-demographic characteristics of Korean immigration frame the sociocultural context of KAs, the majority of whom were not born in the U.S.<sup>35-37</sup> According to the 2010 census, roughly 10% of Asian American Pacific Islanders are KAs. There are two major paths for Korean immigration to the U.S.: to reunite with other family members already

## Dementia Recruitment Minority

8

here or to offer professional and technical skills in demand in the U.S.<sup>35,36</sup> The majority of KA immigrants rated their English level as “minimum” and do not speak English at home regardless of their length of residence in this country.<sup>21,22,35-39</sup> KA older adults reported relatively high levels of education, but not comparable levels of professional jobs. Studies of KAs have revealed that 30% to 40% are self-employed<sup>30,38-41</sup> which explains their relatively low rate of health insurance which is between 42% and 51%.<sup>35,42-44</sup>

### Data Source for GIS

We incorporated a grey literature search to include a diverse and heterogeneous body of material available outside of the traditional academic peer-review process.<sup>45-47</sup> Data estimation of the study populations is mainly based on two sources: local KA community social data and statistical data produced by the U.S. Census Bureau. Census data for the state of New Jersey were extracted at the county level using the American Community Survey (ACS). The ACS is a publicly available survey administered by the U.S. Census Bureau annually. Our main socio-demographic data come from analyzing the 2015-2019 ACS 5-Year Estimates<sup>48</sup> from the Integrated Public Use Microdata Series.<sup>49</sup> However, we also utilized aggregated data for the 2011, 2015, and 2019 ACS when presenting the general population distribution retrieved from the data.census.gov website.<sup>50</sup>

While the Census data contain various geographical and sociodemographic information about different racial/ethnic groups, the nature of the data set does not include community-specific information at a local level. Therefore, we utilized a community participatory mapping approach to harness existing community resources to develop target group-tailored GIS. This participatory GIS relies on the integration of local perspectives and knowledge about the community capacity of conducting this proposed study.<sup>51-53</sup> We obtained expert consultation

## Dementia Recruitment Minority

9

from community leaders, cultural navigators, and key informants with knowledge about ADRD, patterns of residence, health care use, and social activities of KA older adults. When searching for the geographical locations of Korean community facilities online, we used search keywords in both English and Korean such as Korean Americans (재미한국인) or Korean church (한인교회). We tried to use compound nouns such as Korean American instead of Korean so that the search results did not include places in South Korea. We also traced the community list in a hard copy by working with community leaders.

Through the collaboration, we developed a list of local data sets comprised of ethnic churches (from the Korean Catholic Peace Times Weekly<sup>54</sup> and Christian Daily<sup>55</sup>), and ethnic clinics (from the Korean Daily Service<sup>56</sup>). Regarding health services related to ADRD management, we searched websites for AD Research Centers in the New York and New Jersey regions and found that there were no institutions providing Korean-specific services. However, we have found a large number of Korean-serving medical clinics in New Jersey through our own community-based searches.<sup>56</sup> We then mapped the locations of these ethnic community resources to create our own community maps and incorporated them into community outreach activities.

### **Pre-recruitment Analysis**

In analyzing the county-level data from the ACS, we compared different socioeconomic characteristics among selective race/ethnic groups (White, Asians, Koreans, and Chinese) as well as between two age groups (ages 25 and up and 65 and up) within the KA population. In addition to illustrating demographic trends in the study area, we examined the levels of poverty, educational attainment, and limited English proficiency given their crucial impact on one's health condition, healthcare access, and research participation. While the census data have large

## Dementia Recruitment Minority

10

sample sizes to perform multiple between- and within-group comparisons, data from some counties were automatically excluded from analyses (counties with no color in figures). For our geo-spatial analyses, we utilized multiple GIS data sets including the distribution patterns of KA older adult populations, Korean preferred senior apartments, and locations of churches and clinics to integrate spatial and non-spatial (tabular) data sources of U.S. census demographic data.

**Recruitment Plan**

Recruitment of Asian American research participants presents challenges, and one needs to develop innovative target-population tailored strategies instead of utilizing methods developed by and for the mainstream population.<sup>50,57-59</sup> Thus, we developed a decolonizing recruitment approach to recruit participants from the community as a part of the ACAD cohort study to evaluate a novel community-based participatory research sampling method using GIS maps to visualize unique patterns and trends of distribution of the study population who are disproportionately understudied and under-served. The decolonizing recruitment methods is an approach challenging the Eurocentric research methods pertaining to the norms of methodological conceptualization of conformity that undermine the local knowledge and experiences and disproportional socio-cultural characteristics of the marginalized study population groups.<sup>5,51,59-61</sup>

This project represents an academic-practice-community collaboration. Before beginning recruitment, we advertised in ethnic media and social networks to increase awareness and encourage participation in the study. We used "*Tell-A-Friend about Data is Power*" as an ad campaign to communicate the importance of having data from Koreans for Koreans. This recruitment strategy, using language and race matched recruiters and researchers,<sup>35,62-64</sup> would

1 Dementia Recruitment Minority 11

2  
3  
4 promote access to hard-to-reach KAs, and help participants to feel “listened to” and show the  
5  
6 “value of their contribution to the study.” As most KAs are connected and have ties to Korean  
7  
8 churches or senior associations, we utilized a chain referral sampling method, like other forms of  
9  
10 respondent-driven sampling.<sup>35,65-68</sup> We asked the study participants to introduce us to other  
11  
12 Korean American older adults and started with a small number of senior community leaders and  
13  
14 cultural navigators who then recruited directly from their peers who go to the same churches or  
15  
16 live in the same senior apartments. This approach leverages our well-established collaborations  
17  
18 and coordination with a range of multilevel services and existing community capacity.  
19  
20  
21

## 22 Results

23  
24 We created unique socio-spatial and cultural landforms of KA older adults in New Jersey  
25  
26 and the degree to which they are similar or different from other ethnic groups as well as the  
27  
28 general adult population. The GIS maps shown in Figures 1 through 8 are based on data from  
29  
30 both government and local data sets to identify the target sample and improve recruitment.  
31  
32 Bergen County in New Jersey is a growing hub and home to the top five municipalities by the  
33  
34 percentage of the KA population.<sup>64</sup> Compared to the total population in New Jersey as shown in  
35  
36 Figure 1a, KAs are mostly concentrated in three counties (Bergen, Hudson, and Union) and the  
37  
38 highest density is in Bergen County as illustrated in Figure 1b. As indicated in Figure 2, there is  
39  
40 a trend toward an increasing KA population in Morris County and Middlesex County from 2011  
41  
42 to 2019.  
43  
44  
45

46  
47 Moreover, we have found large numbers of Korean ethnic churches: specifically, 11  
48  
49 Catholic churches (Figure 3a) and 124 protestant churches (Figure 3b) and they are primarily  
50  
51 located in Bergen County and Middlesex County in New Jersey. Furthermore, Figure 4  
52  
53  
54  
55  
56  
57  
58  
59  
60

1 Dementia Recruitment Minority

2  
3  
4 illustrates the number of Korean-serving medical clinics and most of them are concentrated in  
5  
6 Bergen County, New Jersey.  
7  
8  
9

10  
11 **Figure 1. Population Density in New Jersey by County in 2019**

12  
13 a. All Population

b. Korean population

14  
15 Source: 2019 American Community Surveys 1 Year-Estimates, Census Bureau

16  
17  
18 **Figure 2. Changes in the Korean Population in New Jersey by County in 2011, 2015, and 2019**

19  
20 a. 2011

b. 2015

21  
22 c. 2019

23  
24 Sources: 2011, 2015, and 2019 American Community Surveys 1 Year-Estimates, Census  
25 Bureau  
26  
27  
28  
29

30  
31 **Figure 3. Number of Korean Churches in New Jersey**

32 Sources: Korean Community Social Networking Service in New Jersey  
33  
34  
35  
36

37  
38 **Figure 4. Number of Clinics with Korean-Serving Providers in New Jersey**

39 Sources: Korean Community Social Networking Service in New Jersey  
40  
41  
42  
43

44  
45 **Table 1: Demographic and Socioeconomic Characteristics among Selected Age and Race/Ethnic Groups in New Jersey**

46  
47 Sources: 2015-2019 American Community Surveys 5-Year Estimates, Census Bureau  
48  
49

50 When analyzed by age we learned that KA older adults (65 years and up) had lower  
51 education levels, higher poverty rates, and more limited English proficiency levels than their  
52  
53 White and Chinese American as well as their younger KA counterparts (Table 1 and Figures 5-  
54  
55  
56  
57  
58  
59  
60

8). In detail, the proportion of the population with lower education and higher poverty rates were much higher for KA older adults compared to their White. A higher proportion of KA older adults' population for both socioeconomic factors were found in portions of northeast (Bergen, Essex, Union, Hudson), central (Middlesex, Somerset, Mercer), and southern counties (Camden) (Figures 5 and 6). For the maps in Figures 7 and 8, limited English proficiency and median income were compared between young KA adults and old KA adults respectively. A higher percentage of the KA Population with limited English proficiency and lower median income were found for KA older adults compared to KA younger adults in most of the counties in New Jersey. These findings of low income and linguistic barriers were concordant with our community assessments that there has been an increase in the presence of KA older adults residing in public senior apartments. We have learned that KA older adults preferred to live where a critical mass of KA reside and close to Korean markets and there was a waitlist to be moved into them. This understanding of geospatial trends of KA older adults housing helped us to design more precise recruitment efforts.

**Figure 5. Proportion of Population Ages 65 and Up with Elementary Schooling or Less among Selected Racial/Ethnic Groups in New Jersey**

a. Whites  
b. Koreans  
c. Chinese

Source: 2015-2019 American Community Surveys 5-Year Estimates, Census Bureau

**Figure 6. Proportion of Population Ages 65 and Up Below the Poverty Level by Selected Race/Ethnic Groups in New Jersey**

a. Whites  
b. Korean



## c. Chinese

Source: 2015-2019 American Community Surveys 5-Year Estimates, Census Bureau

In particular, concerning education, only Hudson County had over 5% of residents reporting no education or only elementary education among White older adults, whereas several counties including Bergen County, Essex County, Middlesex County, Burlington County, and Camden County had over 5% reporting no or only elementary education among KA older adults (Figures 5a and 5b). We also investigated the different geographic distribution of poverty levels between ethnicities in New Jersey (Figure 6). Only one county (Hudson County) has over 6.8% below the poverty level and all other counties have less than 6.8% poverty levels among White older adults (Figure 6a). In contrast, a larger number of counties has over 6.8% of those living below the poverty level among KA and Chinese American older adults (Figure 6b and 6c). Bergen County, Union County, and parts of neighboring counties represented the areas with the highest level of poverty among KA older adults (Figure 6b), while Chinese American older adults living in the highest levels of poverty were primarily concentrated in Warren County and Somerset County (Figure 6c). Especially in Bergen County, although income levels are generally higher among the KA population, the older group has a higher poverty rate (25.1%) compared with the poverty level of 9.6% among all KA adults ages 25 and up, and others of the same age group of Whites (6.1%), Asian Americans (13.0%), and Chinese Americans (4.5%) (Table 1).

**Figure 7. Percent of Korean Population with Limited English Proficiency by Different Age Groups in New Jersey**

a. Ages 25 and Up

b. Ages 65 and Up

Source: 2015-2019 American Community Surveys 5-Year Estimates, Census Bureau

### Figure 8. Median Income of Korean Population by Different Age Groups in New Jersey

a. Ages 25 and Up

b. Ages 65 and Up

Source: 2015-2019 American Community Surveys 5-Year Estimates, Census Bureau

### Outcomes of Recruitment

Based on findings of clusters, we focused our recruitment effort in Bergen County, New Jersey. The recruitment utilizing the GIS strategy we developed based on sociodemographic characteristics of KA older adults who are undereducated, have high poverty rates, and have limited English proficiency. We recruited participants from churches, senior apartments, and a Korean serving local neurologist clinic in Bergen County in order to find those without cognitive problems, with mild cognitive impairment, or with dementia from the community. We proactively identified specific churches and senior apartments with a high density of KA older adults as well as a Korean-speaking neurologist and successfully recruited the aimed subjects earlier than the planned time frame. We found that most study participants resided within a defined recruitment priority area identified by GIS (Table 2; Figure 9). However, half of the participants recruited from clinical sites traveled a distance to Korean-speaking physicians, coming either from New York or suburban areas in New Jersey.

### Figure 9: Geographic Distribution of the Participants by Different Recruitment Sites

**Table 2. Geographic Distribution of the Participants by Recruitment Sites**

### Discussion

We reached our goal of recruiting 60 KA individuals within the proposed period. Our successful recruitment of KA older adults, a hard-to-reach population, benefited from our approach with multiple recruitment strategies including a target population tailored GIS, a detailed understanding of the target population as well as existing community capacity, and a respected relationship between community and researchers.<sup>69-73</sup> Our pilot data suggests that the target population is interested in participating in clinical studies and our approach would contribute to greater awareness of the important role of the community-based GIS recruitment method so that knowledge generated from this study can be used to inform planning and implementation of future studies with other Asian American older adults or other immigrant populations.

We established a consensus-based diagnosis process for study participants to determine diagnostic categories. The consensus conference with more than two bilingual neurologists and bilingual registered nurse data collectors at the sites was completed. In addition, we used a randomized external review of the cases by two neurologists to assure harmonization of diagnosis among all ACAD sites which are in progress. Diagnosis categories included probable/possible AD, mild cognitive impairment, and normal control and the locations where the most AD cases were identified and recruited will be reported in the next report.

Over 15 million older adults aged 65 and older are economically insecure, with incomes below 200% of the federal poverty level.<sup>74</sup> Our findings reveal that KA older adults have distinct socioeconomic characteristics such as higher levels of poverty, lower education levels, and lower

## Dementia Recruitment Minority

17

English proficiency levels compared to other racial/ethnic groups such as White and Chinese. These important differences make it more difficult for the KA older adults to access healthcare facilities compared to other ages and ethnic groups. Most KA older adults live in Bergen County, New Jersey, which borders New York City and is in the top five municipalities with KAs as a percentage of the overall population according to 2010 Census Data.<sup>75</sup> The study findings show that a GIS is useful to: 1) conveniently identify and quantify as well as cluster potentially eligible participants in a targeted geographic area; 2) visualize sociodemographic characteristics of KAs including age, poverty, education, and language; 3) visualize the resources of faith-based organizations and medical clinics. The geographic distribution of KAs is not evenly spread across the state, which is different from that of mainstream populations that might influence their access to health care and health research participation. Given the distinct sociocultural factors and a high degree of local heterogeneity within geographic regions as well as a lack of data sets for small sized population, we have learned that conducting participatory GIS to address local level data deficiency for recruitment of KA older adults in New Jersey could be one solution to increase minority recruitments.

Most participants were recruited from KA dense areas, but the participants recruited from the clinical site did not all reside in KA dense areas but traveled a long distance to see the Korean speaking physician. With only a small number of Korean speaking physicians, ADRD patients or family caregivers are willing to travel a long distance to see culture and language matched health care professionals. The findings that no AD and dementia treating institutions provide KA-specific services even in New York City and Bergen County, New Jersey with a dense KA population points to the challenges KA older adults face with getting a dementia diagnosis and ADRD management. In the same vein, KA older adults inequitably share risks and

## Dementia Recruitment Minority

18

benefits of clinical research participation while it also makes it more difficult for researchers to recruit and study this under-served and under-represented group.

A GIS visual presentation of numeric sociodemographic data plays an essential role in assessing the varied distribution of the small-sized KA minority and is a powerful tool for recruitment strategies to increase understanding of the heterogeneity of minority population distribution, which may not be easily observed in typical numeric data presented in a tabular form. In addition to standard typical datasets, unique data from the community-based social network data based on geodemographics at the local level provides comprehensive data on KA older adults and neighborhoods. The GIS-based information helps us to develop specific group-tailored recruitment strategies by allowing us to conveniently visualize and link demographic, socioeconomic, and local community-level specific characteristics of the target population.

This study demonstrates the value of a community-based participatory research model combined with GIS in tailoring targeted outreach strategies by combining spatial and local resources to identify clusters or enclaves of a hard-to-reach population. When diagnostic data analysis is completed, GIS can define the magnitude of cognitive impairment, and the location of KA ADRD in populations for public health departments and ADRD researchers. We think that it is an excellent strategy that community leaders who provide local resource information continues to be involved in identifying and recruiting potential participants and that they work with senior community leaders at KA senior dense apartments rather than general community leaders as they have closer relationships with older adults. The benefit of providing a multitude of datasets for GIS development is that the application can be directly integrated with the recruitment plans. Based on our findings, we will continue to develop a community-based recruitment plan for

## Dementia Recruitment Minority

19

Asian American older adults residing in the community in New Jersey and in the Northeast region of the U.S. to secure racially/ethnically diverse samples.

**Limitations:** There are several limitations. First, since we were only able to capture a snapshot of the specific socioeconomic characteristics of the Korean older population using the most recent available Census data prior to the recruitment, our pre-recruitment analysis did not reflect any long-term longitudinal changes and patterns of KA older population. Second, we only examined the socio-demographics of KA older adults in New Jersey and did not identify urban versus rural environments so that the findings must be cautiously applied to other geographic regions and other ethnic groups. Third, using publicly available online social network data has inherent limitations related to completeness, correctness, and timeliness in reporting as well as that data might be different from offline data.

### Implications

Our findings demonstrate the value of GIS for the recruitment of Asian American older adult immigrants through utilizing community resources. GIS findings provide a detailed knowledge of the spatial distribution of targeted population attributes of density, income, education, language, churches, and health care clinics for Korean speaking older adults. Moreover, the detailed spatial datasets help us to strategically recruit our target population. Asian Americans have been often referred to as “model minorities” based on their relatively higher

## Dementia Recruitment Minority

20

median income and educational levels compared to other racial/ethnic groups in the U.S.<sup>12,16,75,76</sup> but within these groups, a huge variation in income and linguistics exists.<sup>30,77</sup> We showed this heterogeneity by disaggregating demographic, socioeconomic, and cultural characteristics of KAs who otherwise could have been overlooked. Health care and clinical studies for older adult immigrants are particularly challenged by difficulties in recruitment due to low education levels, low economic status, and low English proficiency, and their impact on recruitment should be addressed and further studied. However, developing and implementing GIS by health care researchers is not possible if there is no existing spatial data on the targeted populations. But in reality, there is a lack of community-based social network data for Asian Americans, especially the dataset that disaggregates Asian American subgroups.<sup>78</sup> Most population data tend to not collect relatively small-sized samples of Asian American subgroups; thus, it cannot be meaningfully used in GIS development. As a result, we created an innovative method of local community engagement to capture spatial data about the distribution of churches and KA serving healthcare clinics. These community-based participatory research approaches are based on respect for local knowledge and recognizing that the communities can make a critical contribution by creating and changing things.<sup>18,60,69-71,79</sup> This novel approach based on spatial and non-spatial data into one framework have far-reaching implication in researching currently understudied populations and this is important for both fair representation of all populations and the translatability of the findings.

This approach responds to the call from the National Institute on Aging (NIA) to develop strategies to improve the health status of older adults in diverse populations. Results from the full-scale ACAD study will provide health researchers and policymakers with practical evidence on how to identify and increase the participation of Asian American older adults in clinical

## Dementia Recruitment Minority

21

1  
2  
3  
4 studies that could be used as a national model for reducing health and research disparities among  
5  
6 minority older adult populations. Moreover, this study highlights the importance of GIS  
7  
8 application in public health studies and has major implications for our understanding of the  
9  
10 heterogeneity of minority population distribution and community outreach efforts.  
11  
12  
13  
14  
15  
16  
17  
18  
19  
20  
21  
22  
23  
24  
25  
26  
27  
28  
29  
30  
31  
32  
33  
34  
35  
36  
37  
38  
39  
40  
41  
42  
43  
44  
45  
46  
47  
48  
49  
50  
51  
52  
53  
54  
55  
56  
57  
58  
59  
60



Dementia Recruitment Minority

**Funding Statement**

The work is supported by NIA (R56AG069130), Asian Cohort for Alzheimer’s Disease (ACAD).

For peer review only

1  
2  
3  
4  
5  
6  
7  
8  
9  
10  
11  
12  
13  
14  
15  
16  
17  
18  
19  
20  
21  
22  
23  
24  
25  
26  
27  
28  
29  
30  
31  
32  
33  
34  
35  
36  
37  
38  
39  
40  
41  
42  
43  
44  
45  
46  
47  
48  
49  
50  
51  
52  
53  
54  
55  
56  
57  
58  
59  
60

## Dementia Recruitment Minority

23

**Contribution Statement**

Haeok Lee, PhD: Substantial contributions to the conception, design, data collection, analysis, and interpretation.

Hoehun Ha, PhD: conception and design of the work, analysis, writing, final approval and agreement to be accountable for all aspect of the work.

Sejung Sage Yim, PhDc: design, acquisition, data analysis, interpretation of data, final approval and agreement to be accountable for all aspect of the work.

Hyun-Sik Yang, MD: design, acquisition, and interpretation of data, final approval and agreement to be accountable for all aspect of the work.

Veronica Lee: design, acquisition, reviewing, final approval and agreement to be accountable for all aspect of the work.

Eunju Hong: design, acquisition, reviewing, final approval and agreement to be accountable for all aspect of the work.

Tiffany Chow, MD: conception and interpretation of data, final approval and agreement to be accountable for all aspect of the work.

Van Ta Park, PhD, MPH: conception and interpretation of data, final approval and agreement to be accountable for all aspect of the work.

Li-San Wang, PhD conception and interpretation of data, final approval and agreement to be accountable for all aspect of the work.

Gyung Ah Jun, PhD conception and interpretation of data, final approval and agreement to be accountable for all aspect of the work.

Yun-Beom Choi, MD, PhD: conception and design of the work, interpretation, analysis and interpretation of data conception and interpretation of data, final approval and agreement to be accountable for all aspect of the work.

Dementia Recruitment Minority

**No Competing Interest**

1  
2  
3  
4  
5  
6  
7  
8  
9  
10  
11  
12  
13  
14  
15  
16  
17  
18  
19  
20  
21  
22  
23  
24  
25  
26  
27  
28  
29  
30  
31  
32  
33  
34  
35  
36  
37  
38  
39  
40  
41  
42  
43  
44  
45  
46  
47  
48  
49  
50  
51  
52  
53  
54  
55  
56  
57  
58  
59  
60

For peer review only

### Reference

1. Alzheimer's Association, 2019 Alzheimer's Disease Facts and Figures, *Alzheimers Dement* 2019;15(3):321-87.
2. Matthews KA, Xu W, Gaglioti AH, et al. Racial and ethnic estimates of Alzheimer's disease and related dementias in the United States (2015-2060) in adults aged  $\geq 65$  years. *Alzheimers Dement*. 2019;15(1):17-24.
3. Shin JH. Dementia Epidemiology Fact Sheet 2022. *Ann Rehabil Med*. 2022;46(2):53-59.
4. WHO. World Health Organization Fact sheets of dementia 2022 September. Available: <https://www.who.int/news-room/fact-sheets/detail/dementia>
5. Chin AL, Negash S, Hamilton R. Diversity and disparity in dementia: The impact of ethnoracial differences in Alzheimer's disease. *Alzheimer Dis Assoc Disord*. 2011;25(3):187.
6. Raman R, Quiroz YT, Langford O, et al. Disparities by Race and Ethnicity Among Adults Recruited for a Preclinical Alzheimer Disease Trial. *JAMA Netw Open*. 2021;4(7):e2114364.
7. Kunkle BW, Grenier-Boley B, Sims R, et al. Genetic meta-analysis of diagnosed Alzheimer's disease identifies new risk loci and implicates A $\beta$ , tau, immunity and lipid processing. *Nat Genet*. 2019;51(9):1423-1424.
8. Thornton LR, Amorrortu RP, Smith DW, et al. Exploring willingness of elder Chinese in Houston to participate in clinical research. *Contemp Clin Trials Comm*. 2016;4:33-8.
9. Ma GX, Seals B, Tan Y, et al. Increasing Asian American participation in clinical trials by addressing community concerns. *Clin Trials*. 2014;11(3):328-35.
10. George S, Duran N, Norris K. A systematic review of barriers and facilitators to minority research participation among African Americans, Latinos, Asian Americans, and Pacific islanders. *Am J Public Health*. 2014;104(2):e16-31.
11. Colby S, Ortman J. Projections of the size and composition of the US population: 2014 to 2060 (Current Population Reports, P25-1143). Washington, DC: US Census Bureau; 2017 Accessed January 2023.
12. National Asian Pacific Center of Aging (NAPCA). Asian Americans and Pacific Islanders in the United States Aged 65 Years and Older: Population, Nativity, and Language. Data Brief, 2013;1(3):1-9.
13. Faison W E, Schultz S K, Aerssens J, et al. Potential ethnic modifiers in the assessment and treatment of Alzheimer's disease: challenges for the future. *Intern Psychogeriatric*. 2007;9(3):539-58.
14. Lim S, Mohaimin S, Min D, et al. Alzheimer's disease and its related dementias among Asian Americans, Native Hawaiians, and Pacific Islanders: A scoping review. *J Alzheimers Dis*. 2020;77(2):523-537.
15. DHHS. Healthy People 2020: Topics & Objectives: Dementia including AD. DIA-1 Data Details, 2018. Available <https://www.healthypeople.gov/node/3517/data-details>.
16. Hoeffel EM, Rastogi S, Kim, MO, et al. The Asian population: 2010 2010 census briefs. Available: <https://www.census.gov/prod/cen2010/briefs/c2010br-11.pdf>
17. Lee S, Martinez G, Ma GX, et al. Barriers to health care access in 13 Asian American communities. *Am J Health Behav*. 2010;34(1):21-30.

18. Lee, H. & Baik, SY. Health disparities or data disparities: sampling issues in hepatitis B Virus infection among Asian American Pacific Islander studies. *Appl Nurs Res.* 2011; 24(2):e9-e15.
19. Quay TA, Frimer L, Janssen PA, *et al* Barriers and facilitators to recruitment of South Asians to health research: a scoping review. *BMJ open.* 2017; 7:e014899.
20. HUGO Pan-Asian SNP Consortium, Abdulla MA, Ahmed I, *et al.* Mapping human genetic diversity in Asia. *Science.* 2009;11;326(5959):1541-15455.
21. Lee S, Kim D, Lee H. Examine Race/Ethnicity Disparities in Perception, Intention, and Screening of Dementia in a Community Setting: Scoping Review. *Int J Environ Res Public Health.* 2022;19(14):8865.
22. Lee H, Kim D, Jung A, *et al.* Ethnicity, Social, and Clinical Risk Factors to Tooth Loss among Older Adults in the U.S., NHANES 2011-2018. *Int J Environ Res Public Health.* 2022;19(4):2382.
23. Disse E, Ledoux S, Bétry C, *et al.* An artificial neural network to predict resting energy expenditure in obesity. *Clin Nutr.* 2018;37(5):1661-1669.
24. Ha H. Using geographically weighted regression for social inequality analysis: association between mentally unhealthy days (MUDs) and socioeconomic status (SES) in U.S. counties. *Int J Environ Health Res.* 2019;29(2):140-153.
25. Ha, H.; & Wanyun, S. A spatial epidemiology case study of mentally unhealthy days (MUDs): air pollution, community resilience, and sunlight perspectives. *Int J Environ Health Res.* 2019;31(5):491-506.
26. Rushton G. Public health, GIS, and spatial analytic tools. *Annu Rev Public Health.* 2003;24:43-56.
27. Solis-Paredes M, Estrada-Gutierrez G, Perichart-Perera O, *et al.* Key clinical factors predicting adipokine and oxidative stress marker concentrations among normal, overweight and obese pregnant women using artificial neural networks. *Int J Mol Sci.* 2017;19(1):86.
28. Cain KL, Salmon J, Conway TL, *et al.* International physical activity and built environment study of adolescents: IPEN adolescent design, protocol and measures. *BMJ Open* 2021;11:e046636.
29. Wang F. Why Public Health Needs GIS: A Methodological overview. *Ann GIS.* 2020;26(1):1-12.
30. Hirshorn, B.A, & Stewart JE. Geographic Information Systems in Community-Based Gerontological Research and Practice. *J Appl Geront.* 2003; 22(1): 134–151. <https://doi.org/10.1177/073346402250476>
31. Ho EL, Zhou G, Liew JA, *et al.* Webs of Care: Qualitative GIS Research on Aging, Mobility, and Care Relations in Singapore, *Ann Am Ass Geograp.* 2021;111:5: 1462-1482, DOI: [10.1080/24694452.2020.1807900](https://doi.org/10.1080/24694452.2020.1807900)
32. Li Y, Xu B, Ewing R, Rodriguez C. & Shon H. (2023) Measuring spatial accessibility to adult day services for older adults using GIS. 2023; *Appl Geography*, DOI: [10.1080/23754931.2023.2195869](https://doi.org/10.1080/23754931.2023.2195869)
33. Scerpella DL, Adam A, Marx K, Gitlin LN. Implications of Geographic Information Systems (GIS) for targeted recruitment of older adults with dementia and their caregivers

- in the community: A retrospective analysis. *Contemp Clin Trials Commun.* 2019; 16;14:100338. doi: 10.1016/j.conctc.2019.100338.
34. Firouraghi N, Kiani B, Jafari HT, et al. The role of geographic information system and global positioning system in dementia care and research: a scoping review. *Int J Health Geogr.* 2022; 21(1): 8. doi: 10.1186/s12942-022-00308-1.
35. Lee HO, Lee OJ, Kim S, et al. Differences in knowledge of hepatitis B among Korean immigrants in two cities in the rocky mountain region. *Asian Nurs Res (Korean Soc Nurs Sci).* 200;1(3):165-75
36. Min. P. *Caught in the middle: Korean communities in NY and LA.* University of CA Press. 1996
37. Pew Research Center. *Korean in the U.S. Fact Sheet 2021*, Available: <https://www.pewresearch.org/social-trends/fact-sheet/asian-americans-koreans-in-the-us/>
38. Wu SY. *NJ Labor Market Views: New Jersey's Asian Population by Asian Group: 2010.* New Jersey Labor Market & Demographic Research (N.J. LMDR). 2012, Issue #18. Available: [https://nj.gov/labor/lpa/pub/lmv/lmv\\_18.pdf](https://nj.gov/labor/lpa/pub/lmv/lmv_18.pdf)
39. Li J, Maxwell AE, Glenn BA, et al. Healthcare access and utilization among Korean Americans: The mediating role of English use and proficiency. *Int J Soc Sci Res.* 2016; 4(1):83-97.
40. Min PG, Andrew K. The middleman minority characteristics of Korea immigrants in the United States. *Korean Popul Devel.* 1994;23(2):179-202.
41. Min, PG, Kim C. The Changing effect of education on Asian immigrants' self-employment. *Sociolog Inq.* 2018;88:435-466.
42. Brown ER, Ojeda VD, Wyn R. et al. *Racial and ethnic disparities in access to health insurance and health care.* Los Angeles: UCLA Center for Health Policy Research, 2000. Available: <http://escholarship.org/uc/item/4sf0p1st>
43. Shin H, Song H, Kim J, et al. Insurance, acculturation, and health service utilization among Korean Americans. *J Immigr Health.* 2005;7(2):65-74.
44. Yoo G, Kim B. Korean immigrants and health care access: Implications for the uninsured and underinsured. *Res Soci Heal Care.* 2007;25: 77-94.
45. Adams RJ, Smart P, Huff AS. Shades of grey: Guidelines for working with the grey literature in systematic reviews for management and organizational studies. *Internat J Manag Rev.* 2017;19(4):432–454.
46. Benzies KM, Premji S, Hayden KA, et al. State-of-the-evidence reviews: Advantages and challenges of Including grey literature. *Worldviews Evid-Based Nurs.* 2006;3: 55-61.
47. Piggott-McKellar AE, McNamara KE, Patrick D, Nunn PD, et al. What are the barriers to successful community-based climate change adaptation? A review of grey literature. *Local Environ.* 2019; 24: 374 - 390.
48. U.S. Census Bureau. *Selected demographic characteristics, 2015-2019 American Community Survey 5-year estimates.* 2021. Available: <https://data.census.gov/cedsci/>
49. Ruggie S, Flood S, Foster S, et al. *IPUMS USA: Version 11.0 [dataset].* Minneapolis, MN: IPUMS, 2021. <https://doi.org/10.18128/D010.V11.0>

50. U.S. Census Bureau. 2011, 2015, 2019 American Community Survey 1 year estimates 2021. Available: <https://data.census.gov/cedsci/>
51. Büyüm AM, Kenney C, Koris A, et al. Decolonizing global health: if not now, when? *BMJ Global Health*. 2020;5:e003394.
52. McGill E, Egan M, Petticrew M, et al. Trading quality for relevance: nonhealth decision-makers' use of evidence on the social determinants of health. *BMJ Open* 2015;5:e007053.
53. Hutton NS., McLeod G, Allen TR. et al. Participatory mapping to address neighborhood level data deficiencies for food security assessment in Southeastern Virginia, USA. *Int J Health Geogr*. 2022; 21:17.
54. The Catholic Peace Time Weekly. The Catholic Peace Time Weekly Incorporation. 2022: Available: <https://peacetimesweekly.org/ny/main>
55. Christian Daily: American Korean church address. 2022. Available: [https://kr.christianitydaily.com/address/list.htm?org\\_type=C&ch\\_state=NJ](https://kr.christianitydaily.com/address/list.htm?org_type=C&ch_state=NJ)
56. Korean Daily Service: Korean Business Directory of NY & NJ. 2022. Available [https://haninyp.com/bbs/board.php?bo\\_table=9001&wr\\_id=46](https://haninyp.com/bbs/board.php?bo_table=9001&wr_id=46)
57. Shaghghi A, Bhopal RS, Sheikh A. Approaches to recruiting 'hard-to-reach' populations into re-search: a review of the literature. *Health Promot Persp*. 2011;1(2):86–94.
58. Hwang D A, Lee A, Song J M, et al. Recruitment and retention strategies among racial and ethnic minorities in web-based intervention trials: Retrospective qualitative analysis. *J Med Internet Res*. 2021;23(7):e23959.
59. Islam NS, Khan S, Kwon S, et al. Methodological issues in the collection, analysis, and reporting of granular data in Asian American populations: historical challenges and potential solutions. *J Health Care Poor Underserved*. 2010;21(4):1354-81.
60. Datta R. Decolonizing both researcher and research and its effectiveness in Indigenous research. *Res Ethi*. 2018;14(2):1–24.
61. Zavala M. What do we mean by decolonizing research strategies? Lessons from decolonizing, indigenous research projects in New Zealand and Latin America. *Decolon: Indigen Edu Socie*. 2013;2(1):55–71.
62. Sadler RC, Hippensteel C, Nelson V, et al. Community-engaged development of a GIS-based healthfulness index to shape health equity solutions. *Soc Sci Med*. 2019; 227:63-75.
63. Sharma M. Koh D. Korean Americans in Los Angeles: Decentralized concentration and socio-spatial disparity. *Geograp Rev*. 2019;109(3): 356-381.
64. Chao SZ, Lai NB, Tse MM, et al. Recruitment of Chinese American elders into dementia research: the UCSF ADRC experience. *The Gerontologist*. 2011;51(Sup1):S125–133.
65. Park C, Jang M, Nam S, et al. Church-based recruitment to reach Korean immigrants: An integrative review. *Western J Nurs Res*. 2018;40(9):1396-1421.
66. Heckathorn DD, Respondent-driven sampling: A new approach to the study of hidden population. *Social Problems*.1997;44(2):174–199.
67. Badowski G, Somera LP, Simsiman B, et al. The efficacy of respondent-driven sampling for the health assessment of minority populations. *Canc Epi*. 2017;50(Pt B):214-220.

68. Heckathorn DD. Respondent-driven sampling II: Deriving valid population estimates from chain-referral samples of hidden populations. *Soci Probl.* 2002;49(1):11–34.
69. Shaghghi A, Bhopal RS, Sheikh A. Approaches to recruiting 'hard-to-reach' populations into re-search: A review of the literature. *Health Prom Persp.* 2011;20: 86-94.
70. Field B, Mountain G, Burgess J, et al. Recruiting hard to reach populations to studies: breaking the silence: an example from a study that recruited people with dementia. *BMJ Open.* 2019;9:e030829.
71. Lee HO, Lee OJ, Kim S, Hontz I, Warner A. Differences in knowledge of hepatitis B among Korean immigrants in two cities in the rocky mountain region. *Asian Nurs Res.* 2007 Dec;1(3):165-75.
72. Freire P. Creating alternative research methods: Learning to do it by doing it by doing it. In: Hall B, Gillette A, Tandon R (eds). *Creating knowledge: A monopoly.* New Delhi: Socie Particip Res in Asia.1982: 29-37.
73. Van M. Ta Park, Oanh L. et al. A recruitment registry for Alzheimer's disease and related dementias, aging, and caregiver-related research, *ADs & Demen*, 2022, 10.1002/alz.12667.
74. Cubanski, J., Koma, W., Damico, A, et al. How many seniors live in poverty? Henry J Kaiser Family Foundation. 2018: Available: <https://files.kff.org/attachment/Issue-Brief-How-Many-Seniors-Live-in-Poverty>
75. U.S. Census Bureau. QuickFacts Bergen County, NJ. 2022. Available: <https://www.census.gov/quickfacts/fact/table/bergencountynewjersey/PST045221>
76. Kawai Y. Stereotyping Asian Americans: the dialectic of the model minority and the Yellow Peril. *Howard J Commun.* 2005;16:109–30.
77. Gordon N., Lin TY, Rau J. et al. Aggregation of Asian-American subgroups masks meaningful differences in health and health risks among Asian ethnicities: an electronic health record-based cohort study. *BMC Pub Heal.* 2019;19:1551
78. Yom S, Lor M. Advancing health disparities research: The need to Include Asian American subgroup populations. *J Racial Ethn Health Disparities.* 2022;9(6):2248-2282.
79. Lin CY, Loyola-Sanchez A, Boyling E, et al. Community engagement approaches for Indigenous health research: recommendations based on an integrative review. *BMJ Open* 2020;10:e039736. doi: 10.1136/bmjopen-2020-039736



**Table 1: Demographic and Socioeconomic Characteristics among Selected Age and Race/Ethnic Groups in New Jersey**

|                              | Total     | White     | All Asians | Korean | Chinese |
|------------------------------|-----------|-----------|------------|--------|---------|
| All Counties in NJ           | 8,878,503 | 4,915,451 | 826,767    | 97,127 | 157,323 |
| Bergen County, NJ            | 930,133   | 526,094   | 148,977    | 59,117 | 21,870  |
| Ages 25+                     |           |           |            |        |         |
| Elementary Education or Less | 2.6%      | 1.6%      | 2.2%       | 2.5%   | 2.2%    |
| Below Poverty                | 6.3%      | 4.9%      | 6.1%       | 9.6%   | 5.6%    |
| Limited English              | 6.5%      | 2.2%      | 14.8%      | 24.3%  | 13.2%   |
| Ages 65+                     |           |           |            |        |         |
| Population                   | 17.1%     | 22.0%     | 12.9%      | 13.5%  | 16.3%   |
| Elementary Education or Less | 5.1%      | 3.4%      | 7.2%       | 9.1%   | 6.4%    |
| Below Poverty                | 7.7%      | 6.1%      | 13.0%      | 25.1%  | 4.5%    |
| Limited English              | 11.1%     | 4.1%      | 37.1%      | 58.1%  | 26.9%   |

Sources: 2015-2019 American Community Surveys 5-Year Estimates, Census Bureau

**Table 2: Geographic Distribution of the Participants**

| Recruitment Sources         | N (%)    | Geographic Distribution                                     |
|-----------------------------|----------|-------------------------------------------------------------|
| Ethnic Churches             | 18 (30%) | NY (n=1), Bergen County (n=17)                              |
| Senior Apartment            | 27 (45%) | Bergen County (n=27)                                        |
| Korean-Speaking Neurologist | 15 (25%) | NY (n=4) & non-Bergen Counties (n=3)<br>Bergen County (n=8) |

Figure 1. Population Density in New Jersey by County in 2019



Source: 2019 American Community Surveys 1 Year-Estimates, Census Bureau

Figure 2. Changes in Korean Population in New Jersey by County in 2011, 2015, and 2019

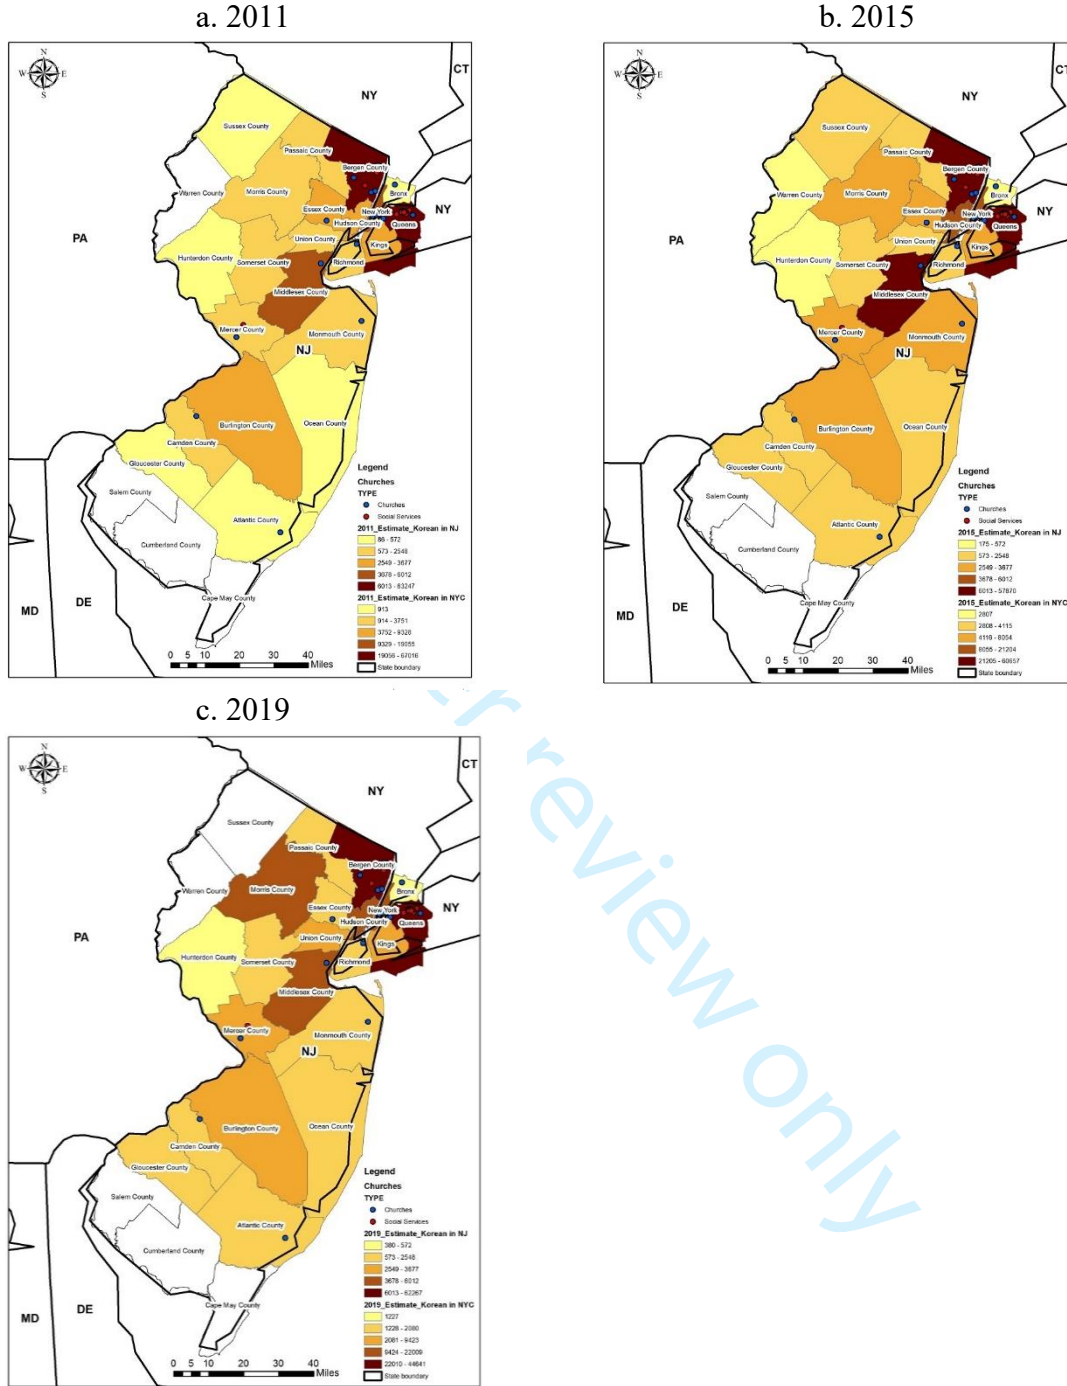

Sources: 2011, 2015, and 2019 American Community Surveys 1 Year-Estimates, Census Bureau

Figure 3: Number of Korean Churches in New Jersey

a. Catholic churches

b. Protestant churches

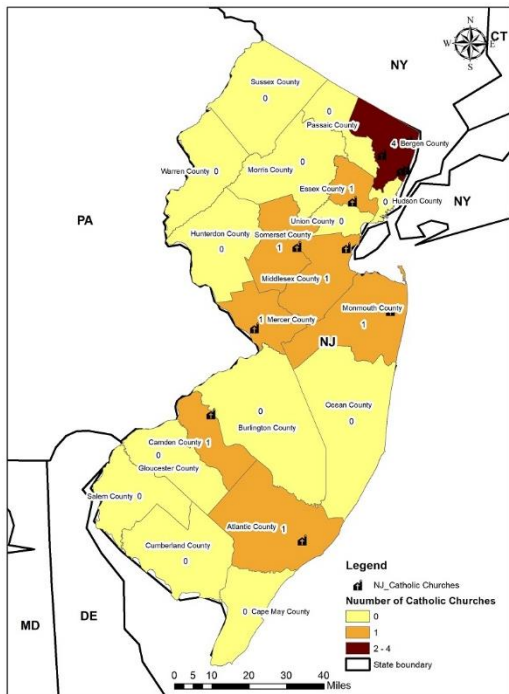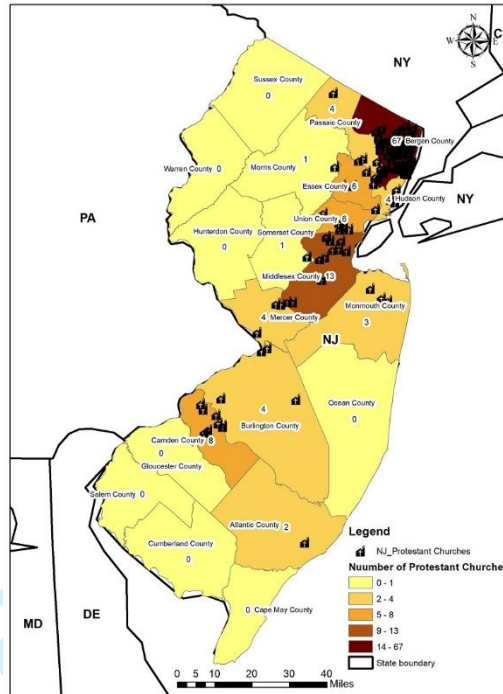

1  
2  
3  
4  
5  
6  
7  
8  
9  
10  
11  
12  
13  
14  
15  
16  
17  
18  
19  
20  
21  
22  
23  
24  
25  
26  
27  
28  
29  
30  
31  
32  
33  
34  
35  
36  
37  
38  
39  
40  
41  
42  
43  
44  
45  
46  
47  
48  
49  
50  
51  
52  
53  
54  
55  
56  
57  
58  
59  
60

**Figure 4. Number of Korean-Serving Clinics in New Jersey**

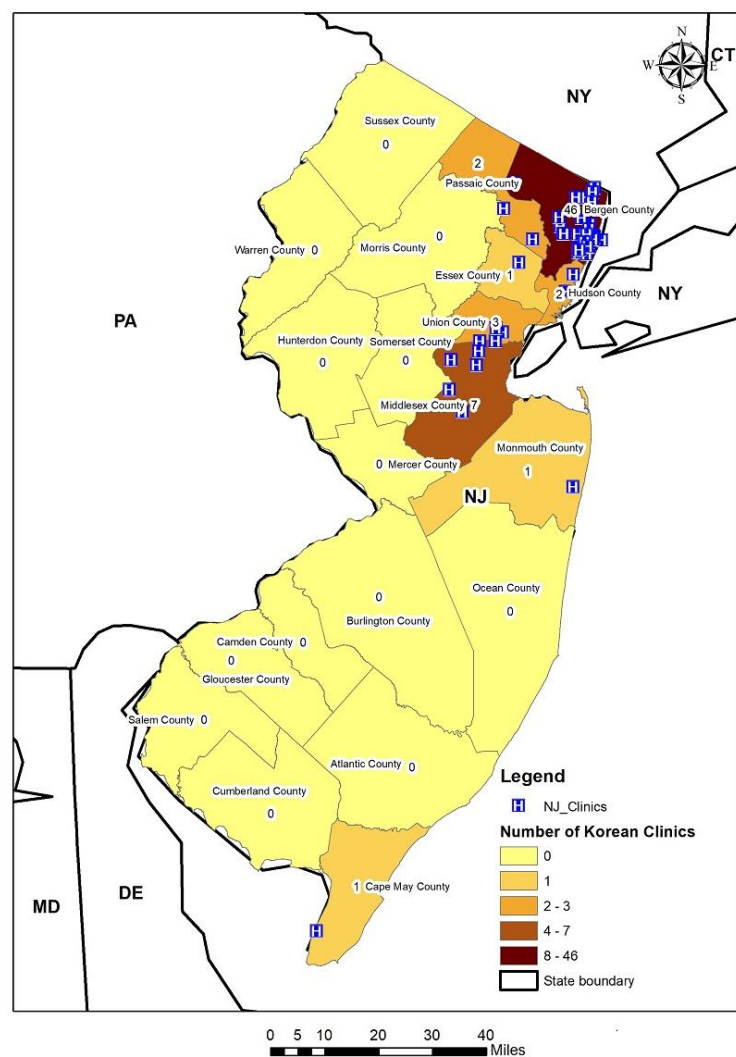

Sources: Korean Community Social Networking Service in New Jersey

**Figure 5. Proportion of Population Ages 65 and Up with Elementary Schooling or Less among Selected Racial/Ethnic Groups in New Jersey**

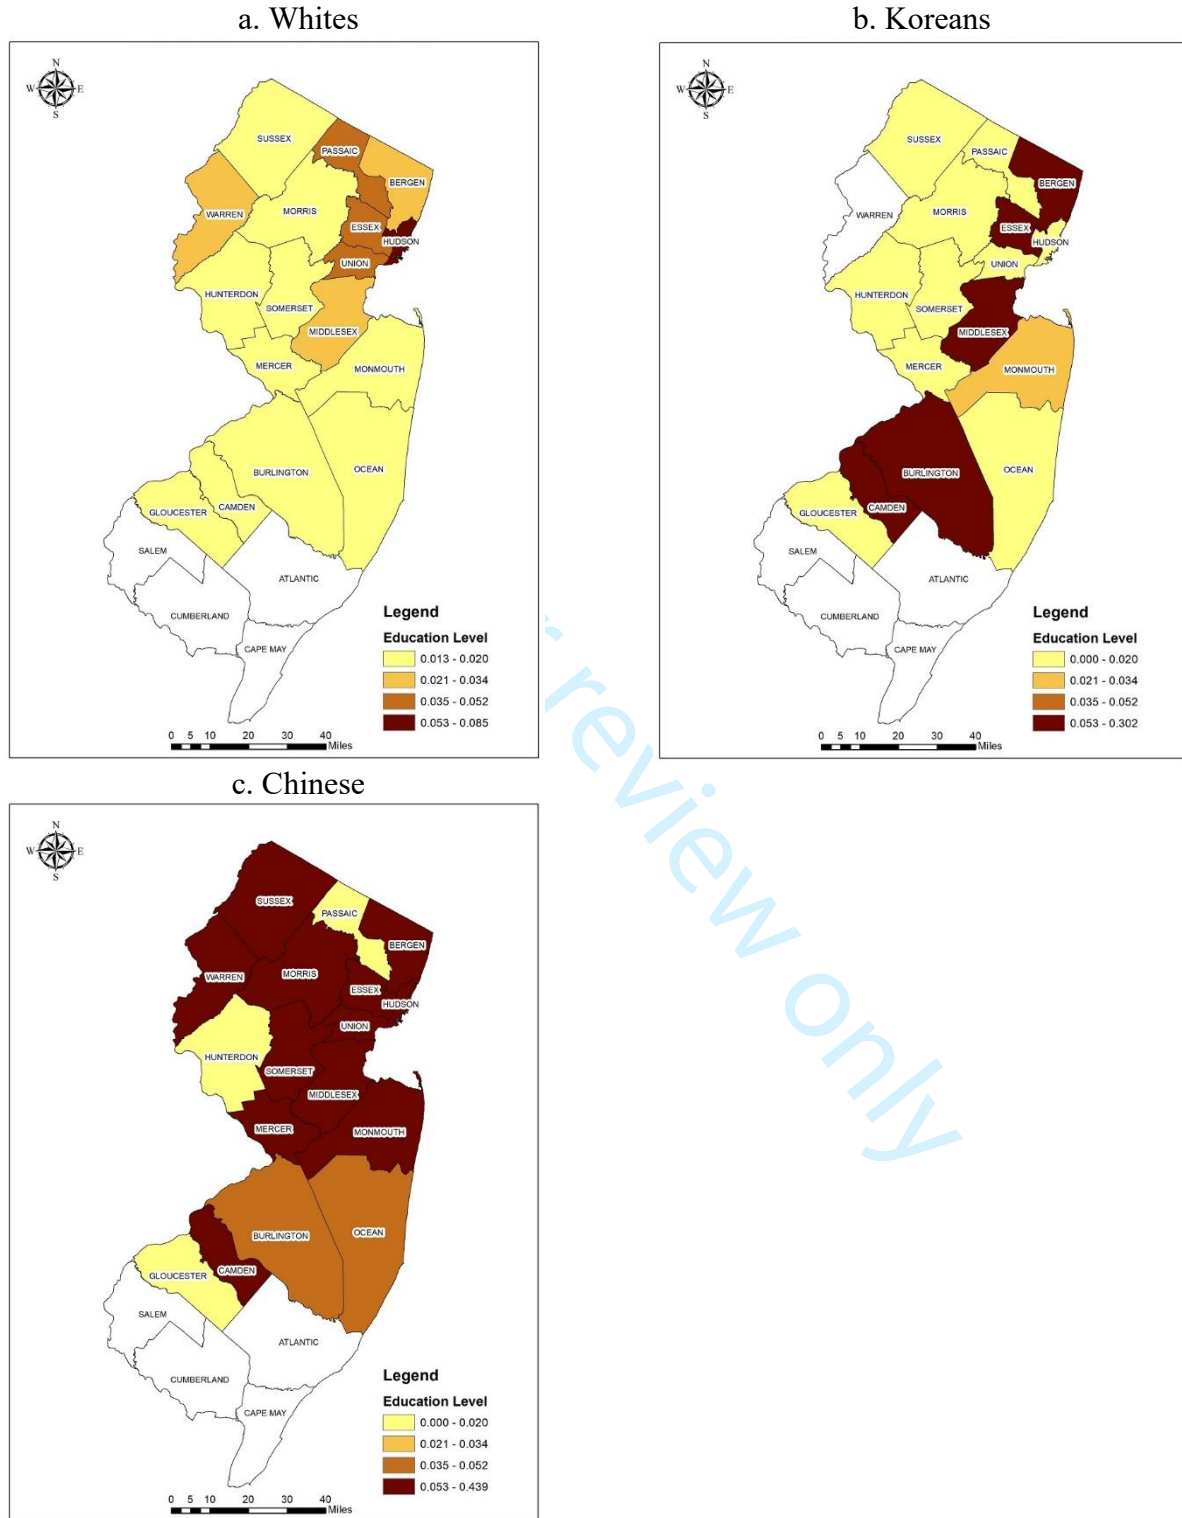

Source: 2015-2019 American Community Surveys 5-Year Estimates, Census Bureau

**Figure 6. Proportion of Population Ages 65 and Up Below Poverty Level by Selected Race/Ethnic Groups in New Jersey**

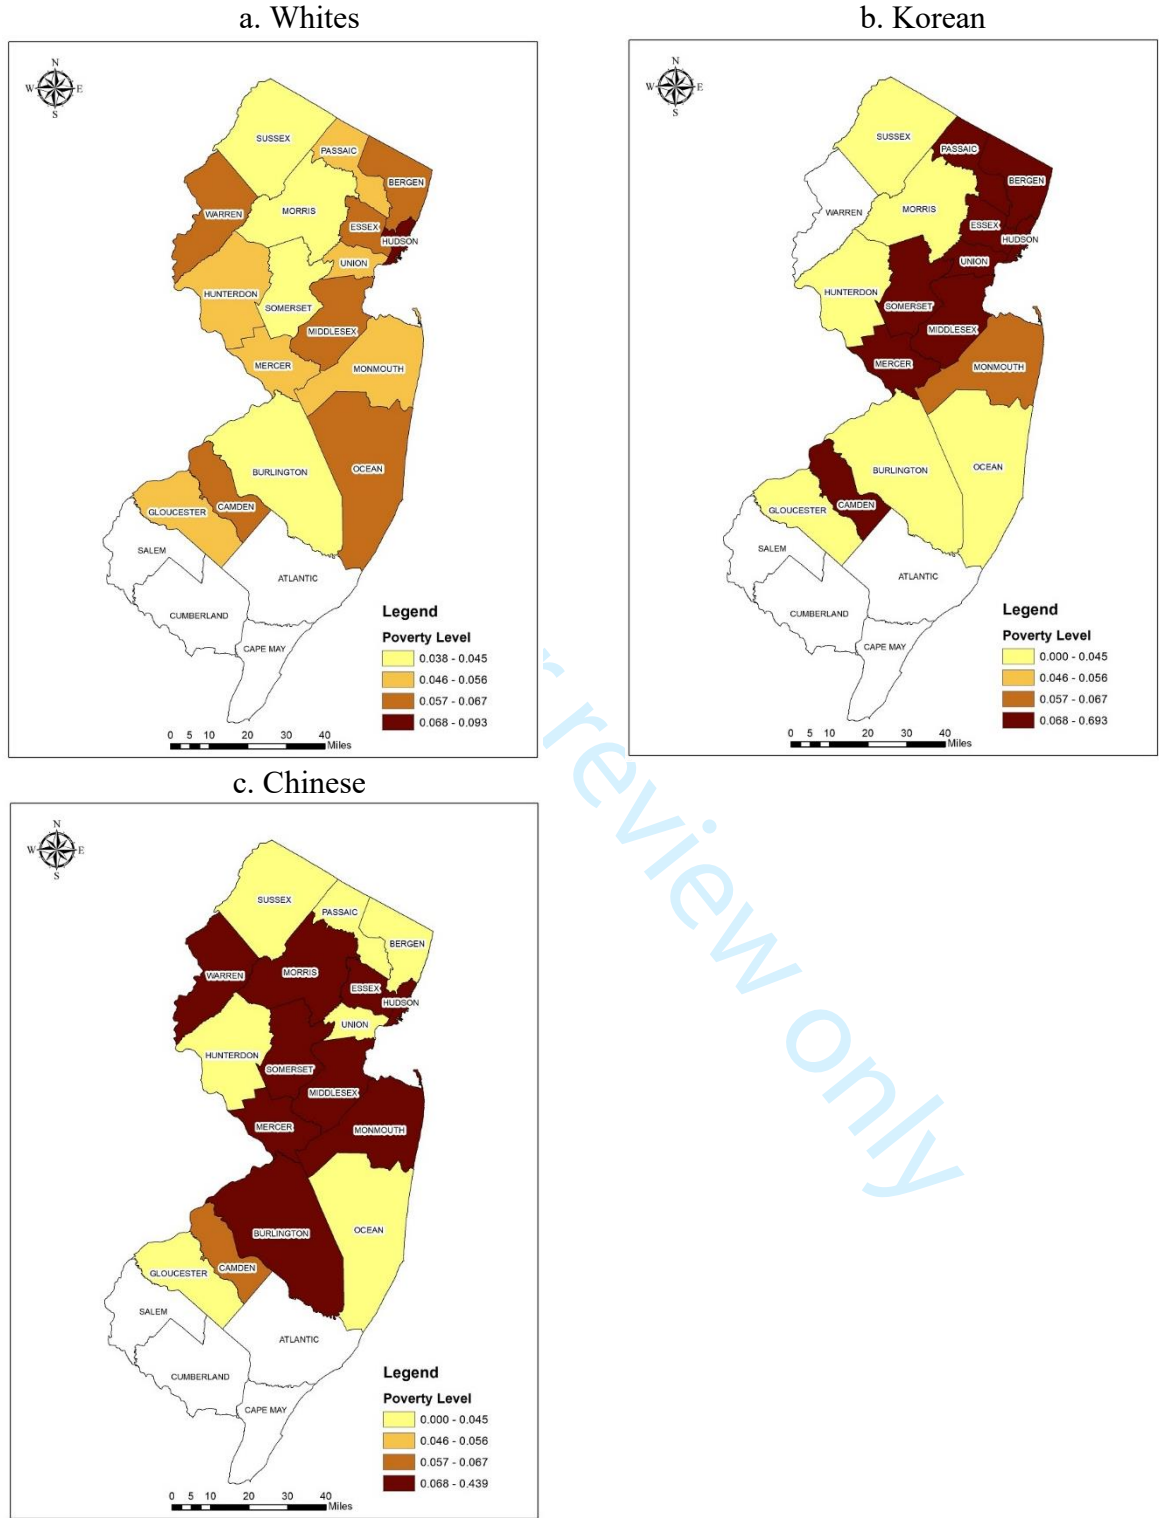

Source: 2015-2019 American Community Surveys 5-Year Estimates, Census Bureau

**Figure 7. Percent of Korean Population with Limited English Proficiency by Different Age Groups in New Jersey**



Source: 2015-2019 American Community Surveys 5-Year Estimates, Census Bureau

review only



Figure 8. Median Income of Korean Population by Different Age Groups in New Jersey

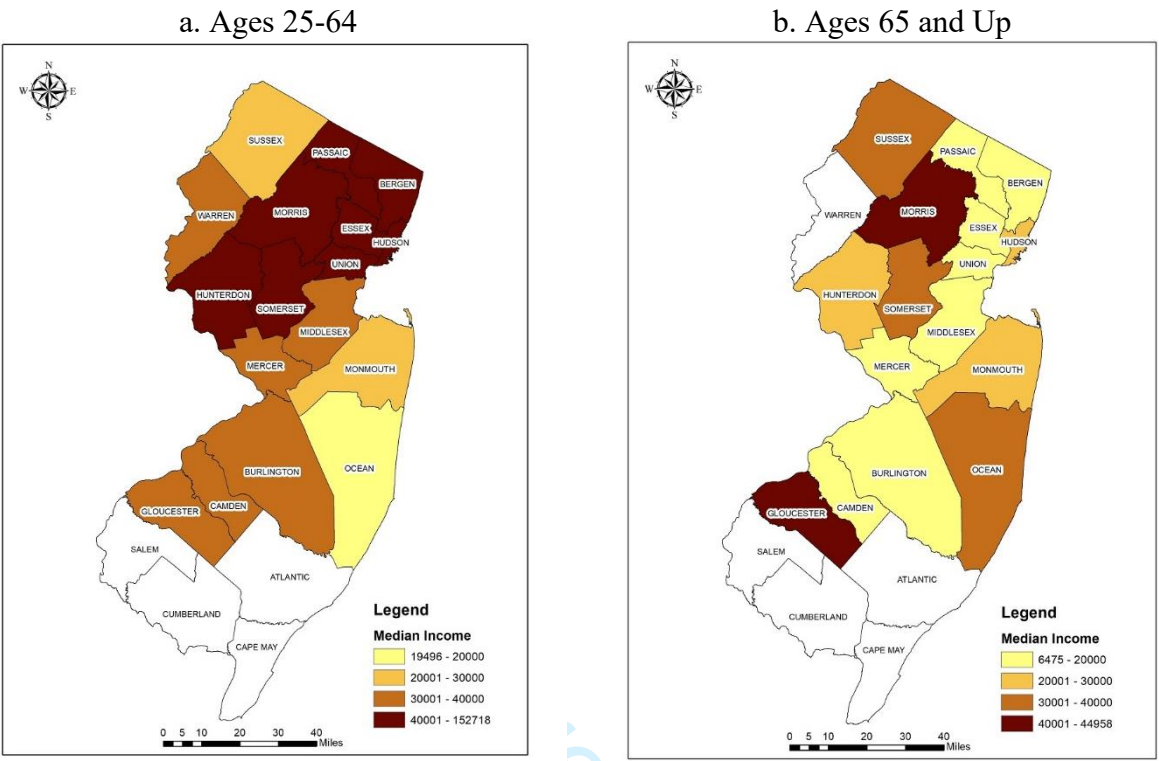

Source: 2015-2019 American Community Surveys 5-Year Estimates, Census Bureau

Review only

**Figure 9: Geographic Distribution of the Participants by Different Recruitment Sites**

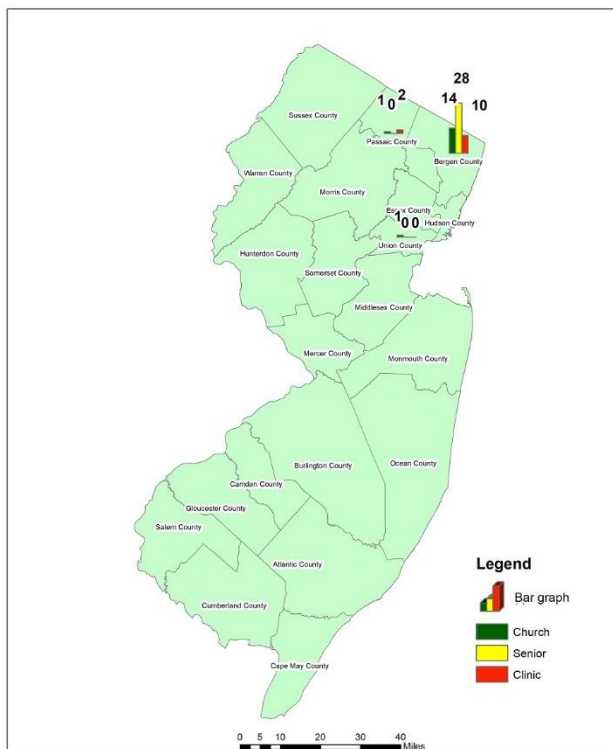

ew only
